# EGF signalling in epithelial carcinoma cells utilizes preformed receptor homoclusters, with larger heteroclusters post activation

Charlotte Fournier<sup>1,2,+</sup>, Adam J. M. Wollman<sup>3,+</sup>, Isabel Llorente-Garcia<sup>1,4,+</sup>, Oliver Harriman<sup>1,+</sup>, Djamila Ouarat<sup>5</sup>, Jenny Wilding<sup>5</sup>, Walter Bodmer<sup>5</sup> and Mark C. Leake<sup>3,\*</sup>

<sup>1</sup> Department of Physics, Clarendon Laboratory, University of Oxford, Oxford OX1 3PU, United Kingdom.

<sup>2</sup> Current address: Okinawa Institute of Science and Technology Graduate University, 119-1 Tancha, Onna-son, Kunigami-gun, Okinawa, Japan 904-0495.

<sup>3</sup> Biological Physical Sciences Institute (BPSI), Departments of Physics and Biology, University of York, York, United Kingdom.

<sup>4</sup> Current address: Department of Physics and Astronomy, University College London, Gower Street, London WC1E 6BT, United Kingdom

<sup>5</sup> MRC Weatherall Institute of Molecular Medicine, University of Oxford, John Radcliffe Hospital, Oxford OX3 9DS, United Kingdom.

<sup>+</sup> These authors contributed jointly to this work

<sup>\*</sup> Correspondence should be addressed to M.C.L: [mark.leake@york.ac.uk](mailto:mark.leake@york.ac.uk)

**Abstract:** Epidermal growth factor (EGF) signalling regulates cell growth, differentiation and proliferation in epithelium and EGF receptor (EGFR) overexpression has been reported in several carcinoma types. Structural and biochemical evidence suggests EGF binding stimulates EGFR monomer-dimer transitions, activating downstream signalling. However, mechanistic details of ligand binding to functional receptors in live cells remain contentious. We report real time single-molecule TIRF of human epithelial carcinoma cells with negligible native EGFR expression, transfected with GFP-tagged EGFR, before and after receptor activation with TMR-labelled EGF ligand. Fluorescently labelled EGFR and EGF are simultaneously tracked to 40nm precision to explore stoichiometry and spatiotemporal dynamics upon EGF binding. Using inhibitors that block binding to EGFR directly, or indirectly through HER2, our results indicate that pre-activated EGFR consists of preformed homoclusters, while larger heteroclusters including HER2 form upon activation. The relative stoichiometry of EGFR to EGF after binding peaks at 2, indicating negative cooperativity of EGFR activation.

## Keywords

Single-molecule, nanoscale, EGF, signal transduction, receptor oligomerization, cancer inhibitors.

35 **Main Text:**

36 The epidermal growth factor receptor (EGFR) is essential for normal growth and development of epithelial  
37 tissues and is a key component in several signaling pathways<sup>1</sup>. Aberrant signal transduction is a primary  
38 driver of many epithelial cancers, EGFR upregulation implicated in formation and progression of several  
39 carcinomas<sup>2</sup>. Human EGFR or ERBB1, (also denoted ‘Erb1’ or ‘HER1’) is a 1,186 amino acid (aa) residue  
40 170 kDa molecular weight protein<sup>3</sup> belonging to a family of receptor tyrosine kinase (RTK) receptors with  
41 three additional members: ERBB2 (‘ErbB2’, ‘HER2’ or ‘neu’), ERBB3 (‘ErbB3’ or ‘HER3’) and ERBB4  
42 (‘ErbB4’ or ‘HER4’) expressed predominantly in the plasma membrane of epithelial cells<sup>4</sup>. EGFR has a  
43 621aa extracellular region, divided into subdomains I-IV<sup>5</sup>. Domains I and III directly participate in ligand  
44 binding<sup>6</sup>, connected via a 23aa hydrophobic transmembrane  $\alpha$ -helix to a 542aa cytoplasmic domain  
45 containing a 300aa tyrosine kinase<sup>7</sup>.

46 EGFR activation requires ligand binding, receptor-receptor interactions, and full activation of the  
47 tyrosine kinase<sup>8</sup>. At least 11 different ligands bind to the EGFR family, four to EGFR including EGF  
48 itself<sup>9</sup>. Prior to ligand binding the tyrosine kinase has low catalytic activity. Ligand binding results in full  
49 kinase activation through c-lobe interaction of an ‘activator’ and n-lobe ‘receiver’<sup>10</sup>. Subsequent  
50 autophosphorylation of intracellular tyrosine residues<sup>11</sup> initiates intracellular reactions ultimately  
51 stimulating cellular growth, differentiation and proliferation<sup>12</sup>, terminated by internalization and  
52 proteolytic degradation of the receptor-ligand complex<sup>13</sup>.

53 The field has detailed insights concerning extracellular and intracellular interactions that contribute  
54 to signal transduction, however, there remains conflicting evidence concerning the *in vivo* composition of  
55 EGFR before and after activation and the role of higher order multimeric complexes of EGFR. Small angle  
56 X-ray scattering and isothermal titration calorimetry to EGFR’s isolated extracellular domain (sEGFR)  
57 suggests that EGF binds to an sEGFR monomer and that receptor dimerization involves subsequent  
58 association of two monomeric EGF-sEGFR<sup>14</sup>. Molecular weight determination by multi-angle laser light  
59 scattering suggests sEGFR is monomeric in solution but dimeric after addition of EGF<sup>15</sup>. Fluorescence  
60 anisotropy indicates a 1:1 binding ratio of EGF:sEGFR, with analytical ultracentrifugation suggesting the  
61 complex is comprised of 2(EGF-sEGFR)<sup>16</sup>. Structural evidence suggests activation is preceded by ligand  
62 binding to a receptor monomer<sup>17-19</sup>, and that EGF induces EGFR conformational change by removing  
63 interactions that auto-inhibit EGFR dimerization<sup>20</sup>. This model assumes that EGF binding increases the  
64 affinity for subsequent EGF to bind to the free EGFR subunit in the dimer (i.e. positively cooperative).  
65 However this is in conflict with EGF-EGFR binding studies of the full length receptor indicating that EGF  
66 binding reduces the affinity for subsequent EGF binding to the free EGFR subunit in the dimer<sup>21</sup> (i.e.  
67 negatively cooperative) mediated through the dimerization arm and intracellular juxta-membrane  
68 domain<sup>22</sup>. Recent structural studies of sEGFR in *Drosophila melanogaster* support a negatively  
69 cooperative model<sup>23</sup>, and it has been shown that EGFR dimers with a single bound EGF can be  
70 phosphorylated<sup>24</sup>. A predication from negative cooperativity is that EGFR:EGF bound complexes have a  
71 relative stoichiometry of 2:1<sup>25</sup>.

72 Chemical crosslinking and immunoprecipitation studies of full length receptors support a  
73 preformed dimer model<sup>26</sup>, suggesting that receptor dimerization is mechanistically decoupled from  
74 activation. Similarly, the first single-molecule fluorescence imaging studies on functional cell membranes  
75 suggested initial binding of one EGF molecule to a preformed EGFR dimer, rapidly followed by a second

76 EGF to form a 2:2 complex<sup>27</sup>. Förster resonance energy transfer (FRET) studies subsequently reported  
77 preformed oligomeric EGFR<sup>28</sup> supported by other live cell microscopy<sup>29</sup>, autocorrelation<sup>30</sup>, bimolecular  
78 fluorescence complementation (BiFC)<sup>31</sup>, fluorescence cross-correlation combined with FRET<sup>32</sup>, mobility  
79 measurements of quantum dot tagged EGFR<sup>33</sup> and pixel brightness analysis of GFP-labeled EGFR<sup>34</sup>.  
80 Recent single-molecule photobleaching analysis suggests that EGFR forms oligomers prior to EGF  
81 binding<sup>35</sup>, and that EGFR clustering may be triggered at physiological EGF levels<sup>36</sup>, which contradicts live  
82 *Xenopus* oocyte studies that report a significant population of monomeric EGFR present before EGF  
83 activation<sup>37</sup>. The observed clustering of EGFR is not unique, but a general feature of cell membrane  
84 receptors in signal activation<sup>38</sup>. However, the EGFR clustering is nuanced in that it may involve  
85 cooperativity not only between monomer subunits of EGFR molecules in a dimer, i.e. an EGFR  
86 homodimer, but also between other ErbB receptor monomers of a different class, i.e. heterodimers<sup>31,34</sup>.

87 EGFR's oligomeric state before and after activation under physiological conditions remains an  
88 open question due to technical limitations in obtaining simultaneous information for the relative  
89 stoichiometry of interacting receptors and ligands, the sensitive dependence of EGF expression levels on  
90 the EGFR state of oligomerization, the presence of both fluorescently labeled and natively unlabeled  
91 EGFR, and species-specific differences of model immortalized cell lines. Previous fluorescence  
92 microscopy studies on live cells have used non-epithelial immortalized rodent sources of mouse (BaF/3,  
93 B82, NIH/3T3) and hamster (CHO-K1). There have also been studies using human epidermoid carcinoma  
94 cells (A431, BT20, A549 and H460). All of these strains have measurable native levels of EGFR  
95 expression; in the case of the most commonly used A431 strain a staggering 2-6 million receptors per cell.  
96 Similarly, recent single-molecule investigations using transfected GFP-labeled EGFR in *Xenopus* oocytes  
97 may still exhibit appreciable expression levels of unlabeled native EGFR since their membrane surface  
98 forms microvilli in which EGF receptors localize<sup>37</sup>. Here, instead, we investigate a human epithelial  
99 carcinoma cell line, with no detectable native EGFR, to improve our understanding of EGF binding to  
100 EGFR in human cancer cells. We overcome previous technical limitations of simultaneous receptor and  
101 ligand measurements using single-molecule dual-colour total internal reflection fluorescence (TIRF)  
102 microscopy on live human colorectal carcinoma cells into which GFP-labelled EGFR has been stably  
103 transfected, coupled to real time nanoscale tracking of the red/orange dye tetramethylrhodamine (TMR)  
104 conjugated to EGF (Fig. 1a). We present results in the presence and absence of cetuximab<sup>52</sup> or  
105 trastuzumab<sup>41</sup>, two popular immunotherapy antibodies which inhibit EGF signalling. We find that EGFR  
106 forms oligomeric clusters prior to EGF binding, with a mode peak stoichiometry of 6 EGFR molecules per  
107 cluster. After EGF binding, we observe clusters containing both EGFR and HER2. These are consistent  
108 with negative cooperativity for EGFR activation by EGF<sup>21</sup>, resolving a key question in the field.

## 109 110 **Results**

111 **Construction of EGFR-GFP carcinoma cells.** Human epithelial cell line SW620 was selected from an  
112 extensive colorectal carcinoma library for its undetectable EGFR expression as quantified by DNA  
113 microarray<sup>42</sup> (Supplementary Fig. 1) and western blot (Fig. 1b). SW620 was stably transfected with  
114 plasmid pEGFR-EGFP-N1 to give SW620-EGFR-GFP (we denote EGFP throughout as simply 'GFP'),  
115 GFP tagging the cytoplasmic domain far from the EGF binding site. Confocal microscopy of live cells

116 confirmed membrane localization (Fig. 1c) with immunofluorescence on fixed cells demonstrating  
 117 colocalization with EGFR (Supplementary Fig. 2a-d).

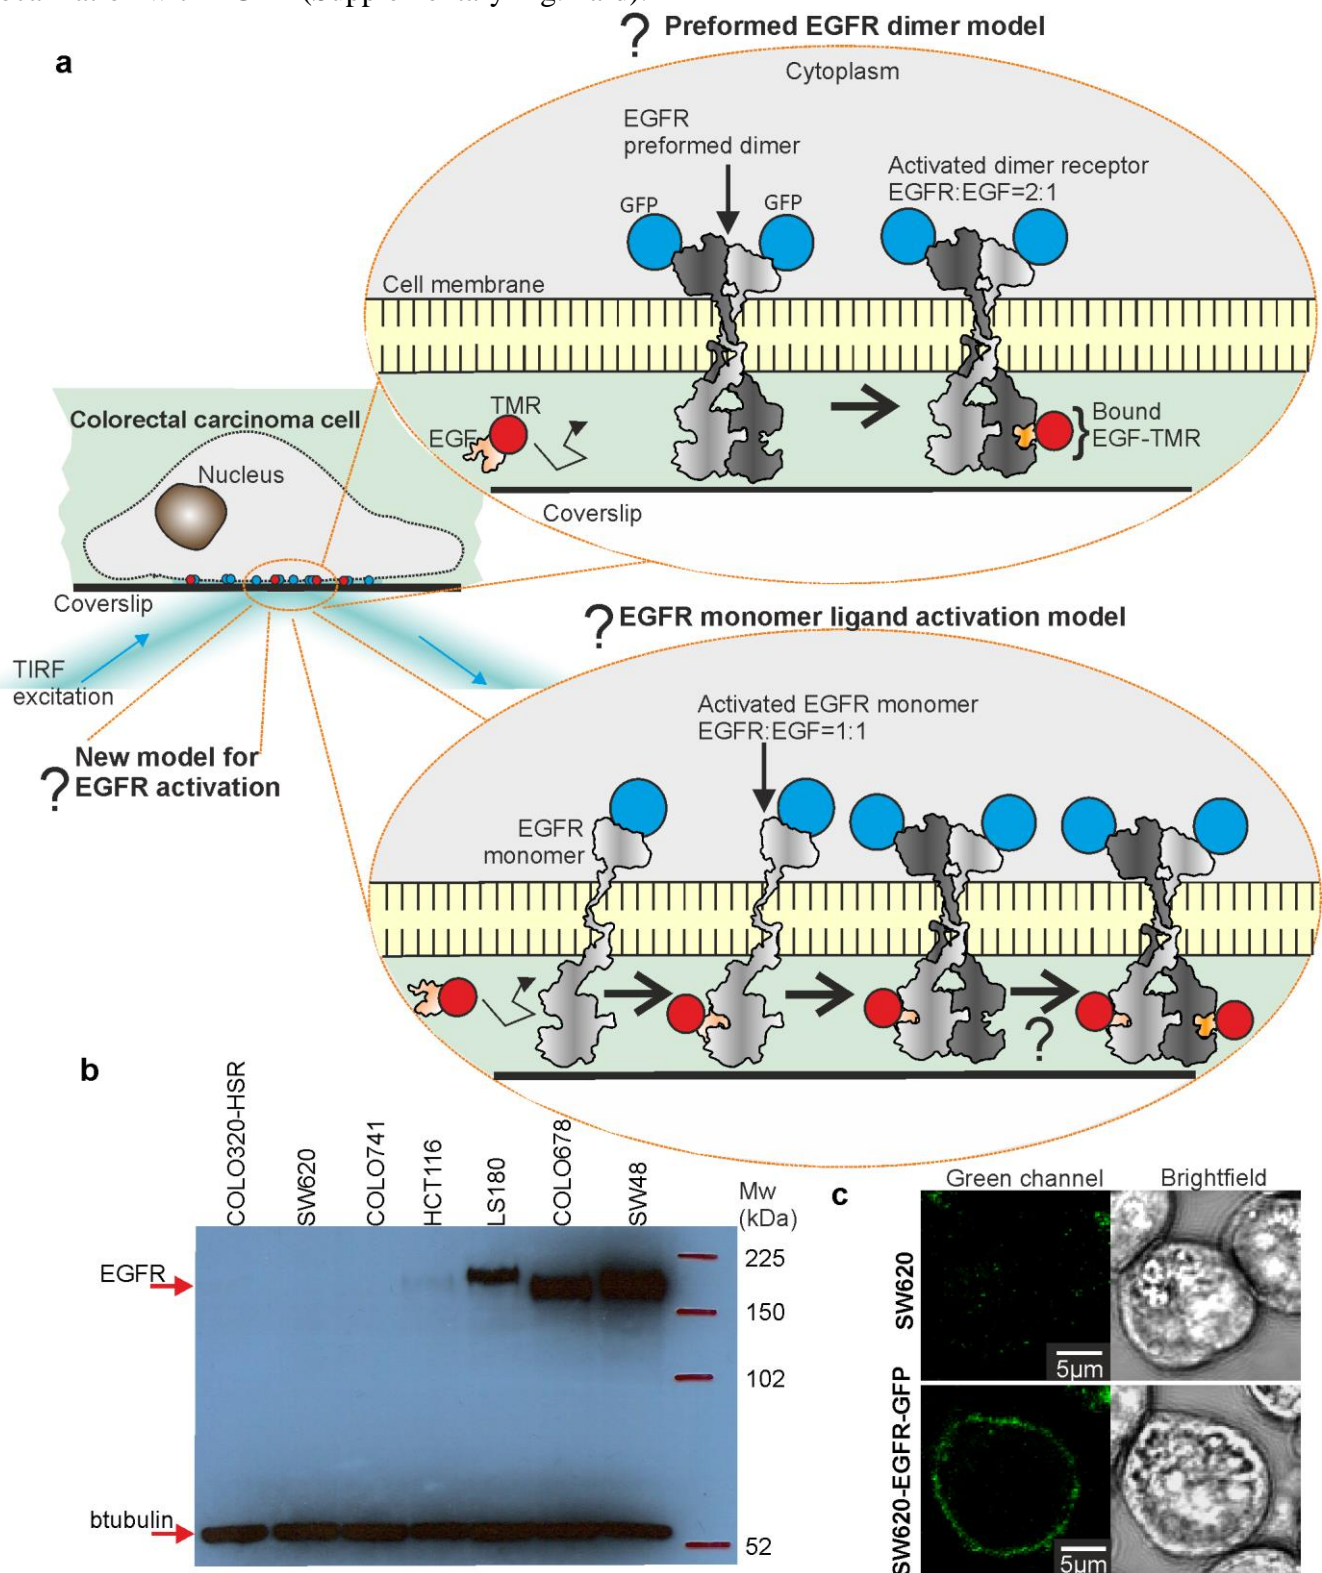

118

119 **Figure 1. Visualizing functional EGF-EGFR complexes in human carcinoma cells.** (a) Dual-colour  
 120 TIRF applied to EGFR-GFP transfected human colorectal carcinoma cells with and without presence of  
 121 fluorescently-labelled EGF-TMR. Several models to explain EGF activation of EGFR have been  
 122 postulated, including ‘monomer’ and ‘preformed dimer’ models (EGFR structure PDB ID 1egf; EGFR

123 monomer and dimer cartoons have been generated by manually combining separate structures with PDB  
124 ID values of 1nql, 1ivo, 2jwa, 1m17 and 2gs6). **(b)** SDS-PAGE taken for several candidate colorectal  
125 carcinoma cell lines, indicating that SW620 COLO320-HSR (as opposed to COLO320-DM, its duplicate  
126 line) and COLO741 (later found to be a melanoma line and so not subsequently used here) have negligible  
127 native EGFR expression levels compared to positive controls of HCT116, LS180, COLO678 and SW48,  
128 shown to have intermediate EGFR expression levels. Note, there is a difference in apparent molecular  
129 weight for EGFR between LS180 and COLO678/SW48, most probably due to glycosylation. **(c)** Parental  
130 (non GFP) SW620 carcinoma cells show minimal autofluorescence in the green TIRF channel (left panel),  
131 while SW620-EGFR-GFP show membrane localization for EGFR-GFP (right panel).

132  
133 **TIRF optimized for single-molecule detection of EGF and EGFR.** We optimized a bespoke dual-colour  
134 TIRF microscope (Supplementary Fig. 2e) for single-molecule detection using a fluorophore assay<sup>43</sup> in  
135 which either GFP or EGF-TMR are conjugated to a glass coverslip using either IgG antibodies or derived  
136 Fab nanobody fragments with binding specificity to GFP or EGF (Supplementary Fig. 3a). We optimized  
137 imaging conditions to yield consistent fields of view containing fluorescent foci of GFP or EGF-TMR  
138 sampled at a video-rate of 30 ms per frame. Foci had a detectable brightness above background noise and a  
139 measured width (defined as half width at half maximum from their pixel intensity profile) in the range 250-  
140 300nm (in comparison to the measured point spread function (PSF) width of our microscope of 230nm).  
141 After ~1 s of continuous laser illumination foci exhibited irreversible step-wise photobleaching (Fig. 2a),  
142 indicative of single molecules of either GFP or EGF-TMR. Each focus had a brightness (summed pixel  
143 intensity integrated over each focus) of ~2,000 counts on our detector (Supplementary Fig. 3b). Although  
144 each IgG molecule contains two Fab sites, we saw no statistically significant difference in the number of  
145 two-step photobleach traces compared to Fab nanobody fragments, suggesting that GFP binding to an IgG  
146 Fab site may limit accessibility for a second GFP.

147  
148 **EGFR is oligomeric prior to EGF binding.** To explore the architecture and dynamics of functional  
149 EGFR we used single-molecule TIRF on live SW620-EGFR-GFP cells. Prior to adding EGF in serum-free  
150 medium we observed several fluorescent foci in the GFP detection channel at a low surface density of 0.1-  
151 0.4 per  $\mu\text{m}^2$  in the plasma membrane (Fig. 2b and Supplementary Fig. 4). We tracked a mean of  $66 \pm 28$   
152 (s.d.) foci per cell and monitored their spatiotemporal dynamics over several seconds to a precision of  
153 ~40nm using bespoke software<sup>44,45</sup>, indicating a range of mobility (Supplementary Video 1). Foci widths  
154 were within ~10% of those observed for single GFP *in vitro*, however, brightness values were far greater.  
155 Foci brightness vs. time during tracking exhibited steps characteristic of stochastic photobleaching of one  
156 or more GFP within a single sampling time window (Fig. 2d), which we used to determine stoichiometry  
157 in terms of number of EGFR-GFP molecules present<sup>43</sup>. To estimate stoichiometry, initial foci brightness  
158 values were determined by interpolation to the start of each acquisition then divided by the *in vivo*  
159 brightness for a single GFP. To determine GFP brightness *in vivo* we quantified the mean foci brightness  
160 towards the end of each photobleach, when only one photoactive GFP molecule remained. Our analysis  
161 indicates that GFP brightness in a live cell is within 15% of that measured *in vitro* (Supplementary Fig.  
162 2b). Previous live cell measurements using the same fluorescent protein indicate that the proportion of  
163 immature GFP is less than 15% of the total<sup>56</sup>. We measured a broad range of stoichiometry, both across

164 different cells and within the same cell, of 2-90 EGFR molecules per fluorescent focus, with a peak integer  
165 value of 6 and associated mean of  $12.8 \pm 0.4$  molecules ( $\pm$ s.e.m.) (Fig. 2e).

166 Since our microscope has the sensitivity to detect single GFP, one important conclusion is that  
167 there is no significant population of monomeric EGFR before adding EGF. The cell line has no detectable  
168 native EGFR expression, so our findings have consistency with a preformed dimer and/or oligomer model  
169 for EGFR<sup>46</sup> as opposed to dimer formation being stimulated by EGF binding to monomeric EGFR, or  
170 where EGFR dimers are stabilized by two bound EGF<sup>14</sup>. We wondered if the observed stoichiometries  
171 could be due to random overlap of diffraction-limited images of individual EGFR-GFP foci. To address  
172 this question we modelled foci separation as a Poisson distribution<sup>47</sup> (Methods), and used these to simulate  
173 apparent EGFR stoichiometries. We simulated monomeric, dimeric, and mixed oligomeric EGFR  
174 (monomers through to tetramers, suggested from a previous single-molecule live cell study<sup>35</sup>), all with  
175 poor agreement to the experimental data (Supplementary Fig. 5a,  $R^2 < 0$ ). We then tried a heuristic Monte  
176 Carlo overlap model (Methods) that simulated oligomeric EGFR whose stoichiometry was sampled  
177 randomly from a Poisson distribution with mean value equal to the peak of 6 that we observed, which  
178 resulted in a reasonable fit to the experimental distribution (Supplementary Fig. 5b,  $R^2 = 0.4923$ ).

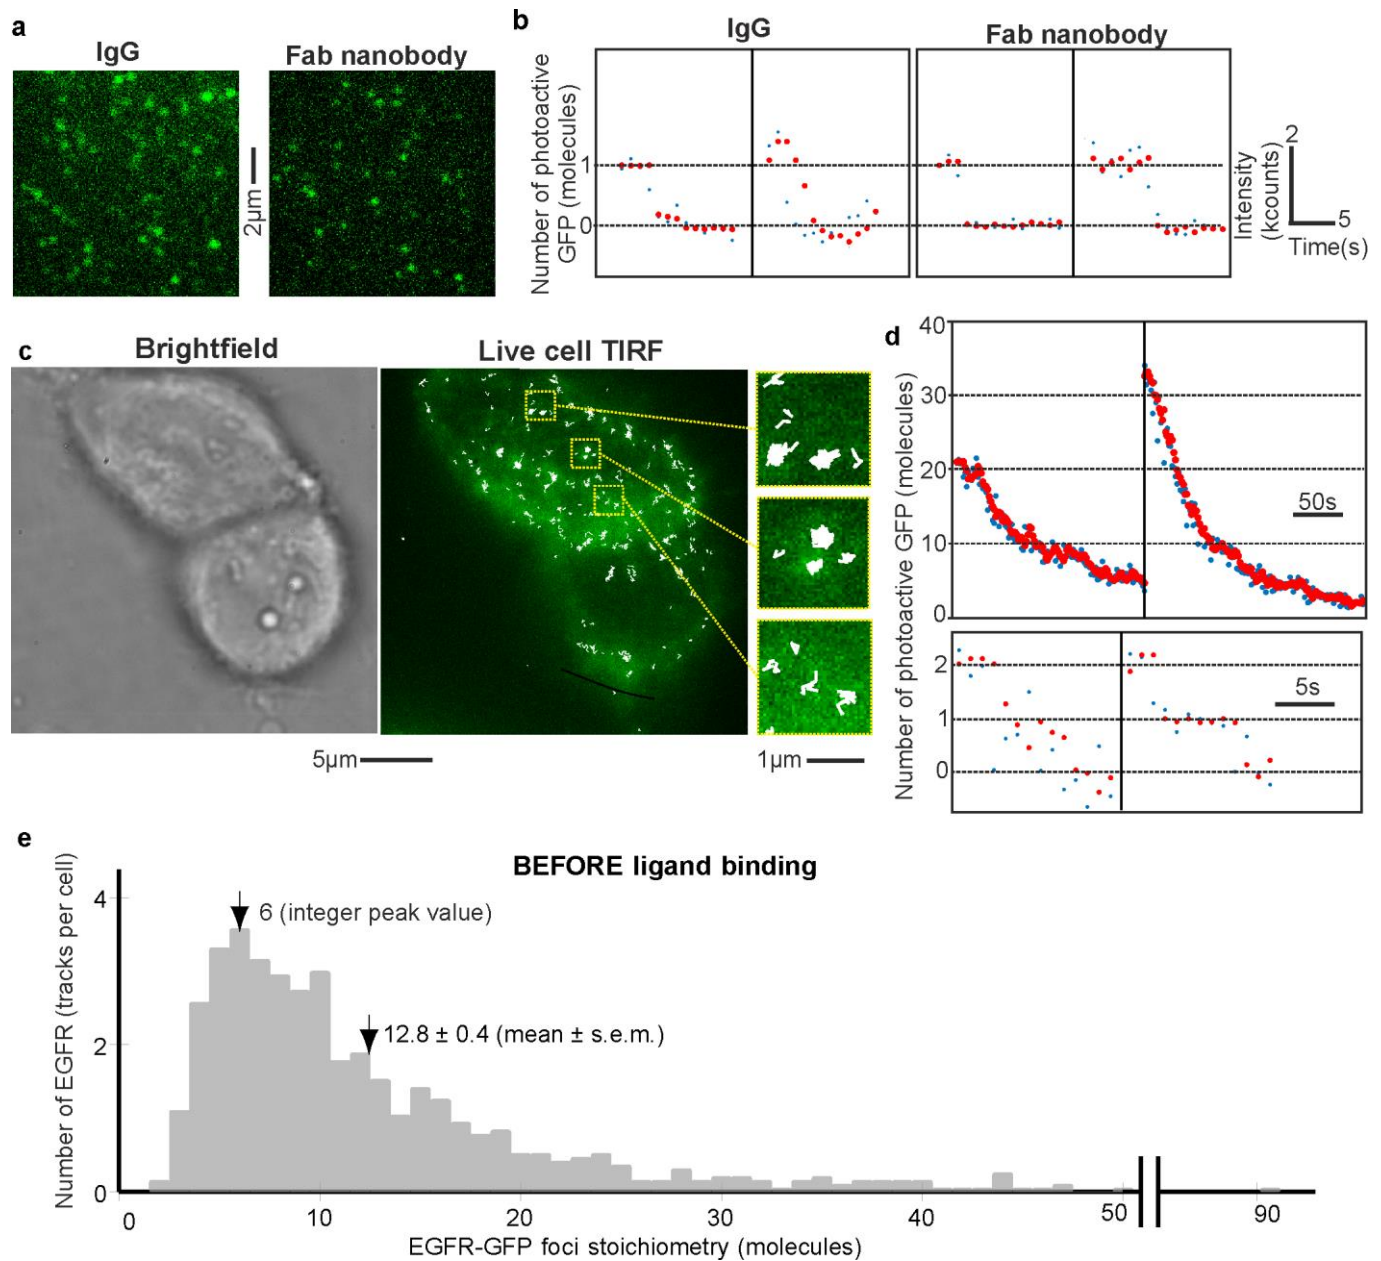

179

180 **Figure 2. Stoichiometry of EGFR before EGF binding.** (a) TIRF images of surface-immobilized GFP *in*  
 181 *vitro* using IgG and Fab nanobody conjugation. (b) Example step-wise photobleach traces show raw (blue)  
 182 and output data of an edge-preserving Chung-Kennedy filter<sup>48,49</sup> (red), kcounts equivalent to counts on our  
 183 camera detector  $\times 10^3$ . (c) Example of two nearby SW620-EGFR-GFP cells showing GFP fluorescence  
 184 (green) and overlaid tracking output (white) with zoom-ins (inset). (d) Example photobleach traces from  
 185 tracked EGFR-GFP foci which have stoichiometries of several tens of EGFR molecules (upper panel),  
 186 down to an observed minimum of just two molecules (lower panel), raw and overlaid filtered data shown.  
 187 (e) Distribution of EGFR-GFP foci stoichiometry before EGF activation, showing a modal peak at 6 and  
 188 mean  $\sim 12.8$  molecules. Data extracted from N=19 cells, detecting N=1,250 foci tracks, corresponding to  
 189 mean of  $\sim 780$  EGFR molecules per cell.

190

191 **EGF binding to EGFR is negatively cooperative.** To determine the effect of EGF binding on EGFR  
192 stoichiometry and spatiotemporal dynamics, live SW620-EGFR-GFP cells and non-GFP controls were  
193 kept in serum-free media for 12-24 h to minimize binding of any serum-based EGFR ligands. We  
194 visualized cells using dual-colour TIRF then added EGF-TMR, enabling simultaneous observation of  
195 EGFR and EGF in separate green and red colour channels respectively, before and after EGF activation.  
196 Excess EGF-TMR was retained in the sample chamber during imaging enabling observations over  
197 incubation times from 3-60 min. We observed a mean of  $82 \pm 36$  EGFR foci tracks per cell across all  
198 incubation times, significantly higher than when EGF was absent. Colocalization of EGFR and EGF foci  
199 was determined using numerical integration between overlapping green and red channel foci<sup>47</sup>.

200 After EGF incubation from as little as a few minutes, colocalization between green and red channel  
201 foci was clearly detected (Fig. 3a, Supplementary Video 2 and Supplementary Fig. 6a). We estimated that  
202  $40 \pm 18\%$  of foci were colocalized EGFR-EGF when calculated across the full 60 min incubation, ~15 foci  
203 per cell or 64% of all EGFR molecules (Fig. 3b,c). EGFR-EGF foci had a statistically higher mean  
204 stoichiometry (Student's *t*-test  $P < 0.0001$ ) of ~31 EGFR molecules compared to isolated receptors whose  
205 mean stoichiometry was ~11 EGFR molecules, consistent with measurements made before adding EGF  
206 indicating that effects from putative non-EGF ligands in the serum-free media were negligible (Fig. 3d,  
207 Table 1). The mean stoichiometry of isolated EGFR clusters remained roughly constant in the range ~8-14  
208 molecules during incubation with EGF (Fig. 3e). The mean stoichiometry of EGFR-EGF clusters increased  
209 to ~32 EGFR molecules 10-15 min after adding EGF, up to a peak of ~70 EGFR molecules after ~40 min.  
210 At higher times EGFR endocytosis is prevalent<sup>50</sup>, consistent with observing some brighter EGFR foci in  
211 the main body of the cell, which may account for lower mean stoichiometry values of ~20-30 EGFR  
212 molecules per focus from ~40 min onwards.

213



214

| Biochemical intervention |   |   | EGFR foci stoichiometry, uncolocalized      |        | EGFR foci stoichiometry, colocalized with EGF |        | N cells |
|--------------------------|---|---|---------------------------------------------|--------|-----------------------------------------------|--------|---------|
| E                        | C | T | Mean $\pm$ s.e.m (molecules per EGFR focus) | N foci | Mean $\pm$ s.e.m (molecules per EGFR focus)   | N foci |         |
| -                        | - | - | 12.8 $\pm$ 0.4                              | 770    | X                                             | X      | 19      |
| +                        | - | - | 10.8 $\pm$ 0.2                              | 4,741  | 31.1 $\pm$ 1.1                                | 1,969  | 117     |
| -                        | + | - | 19.9 $\pm$ 1.0                              | 531    | X                                             | X      | 10      |
| -                        | - | + | 15.3 $\pm$ 0.7                              | 408    | X                                             | X      | 10      |
| +                        | + | - | 18.8 $\pm$ 0.5                              | 916    | 51.0 $\pm$ 2.1                                | 303    | 25      |
| +                        | - | + | 16.8 $\pm$ 0.4                              | 1,273  | 44.2 $\pm$ 2.4                                | 334    | 27      |

215

216

217

218

219

**Table 1. Mean EGFR foci stoichiometry values.** Number of tracked foci in total (N foci) and individual cells (N cells) in datasets indicated. Biochemical interventions for added EGF (E), cetuximab (C), and trastuzumab (T) shown.

220

221

222

223

224

225

226

227

228

229

230

231

232

233

234

235

236

237

EGF-TMR quantified *in vitro* using conjugation to glass coverslips exhibited similar step-wise photobleaching as for GFP (Supplementary Fig. 3b). To determine the relative stoichiometry between EGFR and EGF when EGF is bound (i.e. the activated state) we measured red channel stoichiometry simultaneously to the green channel for EGF-EGFR foci. This analysis revealed a clear peak corresponding to a relative stoichiometry for EGFR:EGF of 2:1 (Fig. 3f, which pools data into integer width histogram bins). By using the measured variability in GFP and TMR brightness we estimate the error for the relative stoichiometry is  $\sim 0.7$ , in agreement with the half width at half maximum under the 2:1 peak, indicating that the apparent population in the 1:1 peak histogram bin is consistent with measurement error from the 2:1 population. Sub-dividing data by EGF incubation time revealed no significant shift in relative stoichiometry from the 2:1 peak (shown in kernel density estimations of Supplementary Fig. 6b where data has not been pooled into integer histogram bins). Before EGF-TMR was added in control experiments to the parental (non-GFP) strain we detected a small number of autofluorescent foci in red and green channels resulting in pseudo colocalization of  $\sim 2$ -3 tracks per cell ( $\sim 3\%$  of all colocalized foci). These pseudo colocalized tracks resulted in a small peak for the apparent relative stoichiometry in green:red colour channels equivalent to  $\sim 0.5$ :1 (Supplementary Fig. 6c), thus had a negligible impact on the measurements of the 2:1 peak. Adding EGF-TMR to this strain indicated foci detection levels in the red channel which were statistically indistinguishable (Student's *t*-test  $P > 0.05$ ) to those measured in the absence of EGF-TMR (Fig. 4a).

238

239

240

241

242

243

Our findings indicate that the most likely receptor-ligand complex is a singly ligated EGFR dimer, consistent with a negatively cooperative mechanism for EGFR activation (Fig. 1a, upper schematic), i.e. a multiple EGF binding exclusion effect<sup>21</sup>. An alternative model consisting of initial EGF binding to monomeric EGFR to generate an activated state predisposed to form dimeric EGFR<sup>17-19</sup> (Fig. 1a, lower schematic) predicts a significant 1:1 population, contrary to our observations. With this model, the proportion of 1:1 relative to 2:1 states might be expected to increase with longer EGF incubation times

244 since there are putative steps directly dependent on the EGF on-rate, however, we observed no such  
 245 dependence.

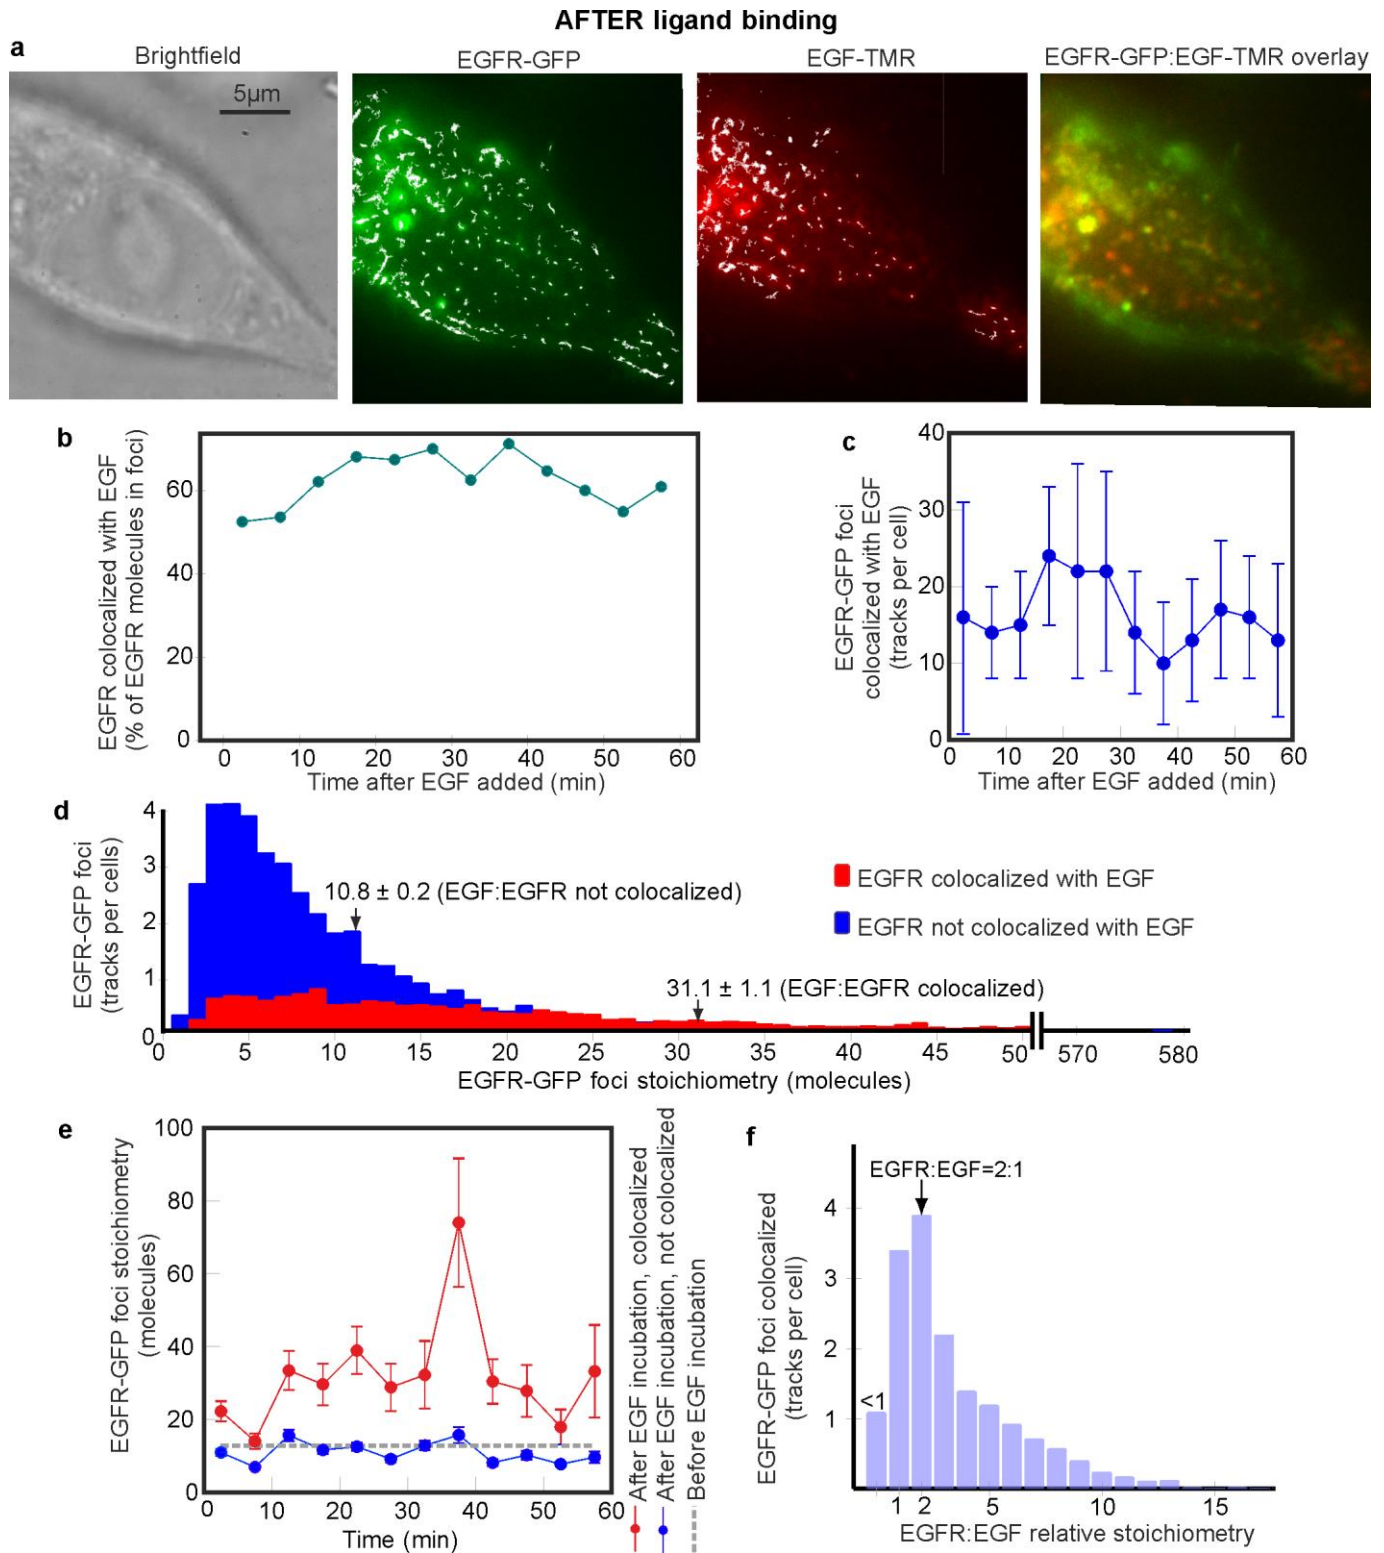

246

247 **Figure 3. Effect of EGF binding on EGFR stoichiometry.** (a) Brightfield and TIRF images of SW620-  
 248 EGFR-GFP after adding EGF (~10 min incubation time point), GFP (green), TMR (red) and overlay  
 249 images shown (yellow indicates high colocalization). (b) % of EGFR foci colocalized to EGF, (c) number  
 250 of EGFR-EGF foci detected per cell (s.d. error bars). (d) EGFR-EGF foci stoichiometry (red) and isolated

251 EGFR foci (blue) across all EGF incubation times, mean and s.e.m. indicated (arrows), and (e) as a  
252 function of incubation time (s.d. error bars). We categorized cells into 6 min interval bins resulting in  
253 N = 6-12 cells in each bin. (f) Distribution of relative stoichiometry of EGFR:EGF, integer bin widths,  
254 peak value at 2:1 indicated (arrow). Data extracted from a total of N = 119 cells.

255

256 **EGFR clustering increases through direct and indirect EGF inhibition.** To further understand the  
257 effect of EGF binding on EGFR clustering we performed live cell TIRF in the presence of cetuximab or  
258 trastuzumab. Cetuximab is a monoclonal antibody anti-cancer drug commonly used against neck and  
259 colorectal cancers in advanced stages to inhibit cell division and growth<sup>51</sup>, binding to domain III of the  
260 soluble extracellular region of EGFR, and believed to result in partial blockage of the EGF binding region  
261 as well inhibiting the receptor from adopting an extended conformation which may be required for EGFR  
262 dimerization<sup>52</sup>. Trastuzumab is also a monoclonal antibody anti-cancer drug, commonly used to treat breast  
263 cancer<sup>52</sup>, with similar effects of inhibiting cell division and growth, however, it does not bind directly to  
264 EGFR but instead to domain IV of the extracellular segment of HER2/neu, and its inhibitory action is  
265 believed to be related to the association of EGFR and HER2/neu in the plasma membrane<sup>41</sup>.

266 Before adding EGF we found that treatment with cetuximab or trastuzumab at concentration levels  
267 comparable to those used in cancer treatment resulted in a statistically significant increase in the mean  
268 stoichiometry of EGFR-GFP foci by ~25% and ~65% (Student's *t*-test,  $P < 0.0001$ ) respectively (Fig. 4a),  
269 but with no effect on the number of detected EGFR-GFP foci per cell. Adding EGF resulted in ~20%  
270 fewer EGFR-EGF foci for cetuximab- or trastuzumab-treated cells compared to untreated cells (Fig. 4b).

271

272

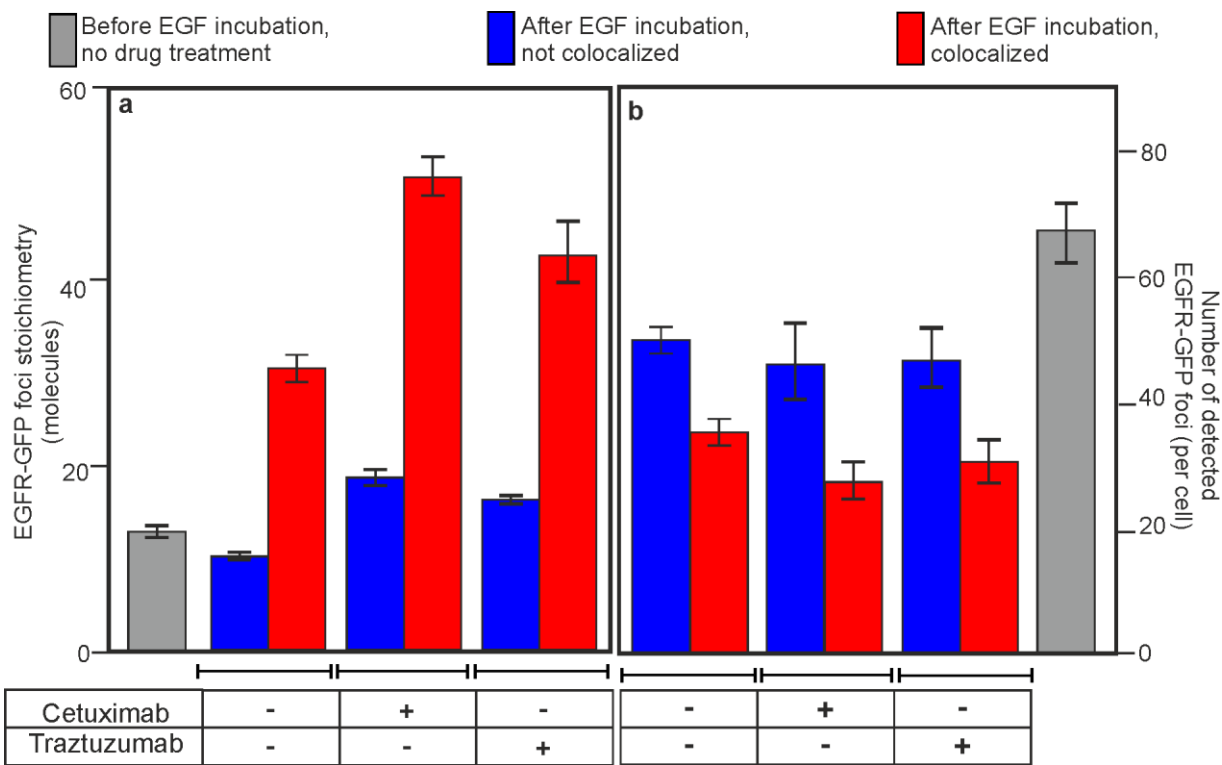

273

274 **Figure 4. Effect of cetuximab and trastuzumab on EGF binding to EGFR.** (a) Variation of mean  
 275 EGFR-GFP foci stoichiometry, and (b) number of EGFR-GFP foci detected per cell. EGFR-EGF (red)  
 276 and isolated EGFR foci (blue) are indicated for +/- addition of cetuximab and trastuzumab. Error bars are s.d,  
 277 number of cells per dataset in the range N =10 – 117.

278 The mean stoichiometry of EGFR-EGF foci in cetuximab and trastuzumab treatment datasets is  $51 \pm 2$  and  
 279  $44 \pm 2$  EGFR molecules per focus respectively, with the upper end having values of several hundred  
 280 molecules (Fig. 5a, Table 1), consistent with previous qualitative observations that several different EGF  
 281 pathway inhibitors increase EGRF clustering<sup>53,54</sup>. We also observed a shift to higher EGFR:EGF relative  
 282 stoichiometry values for both cetuximab and trastuzumab treatments beyond the 2:1 peak observed for  
 283 untreated cells (Fig. 5b).

284

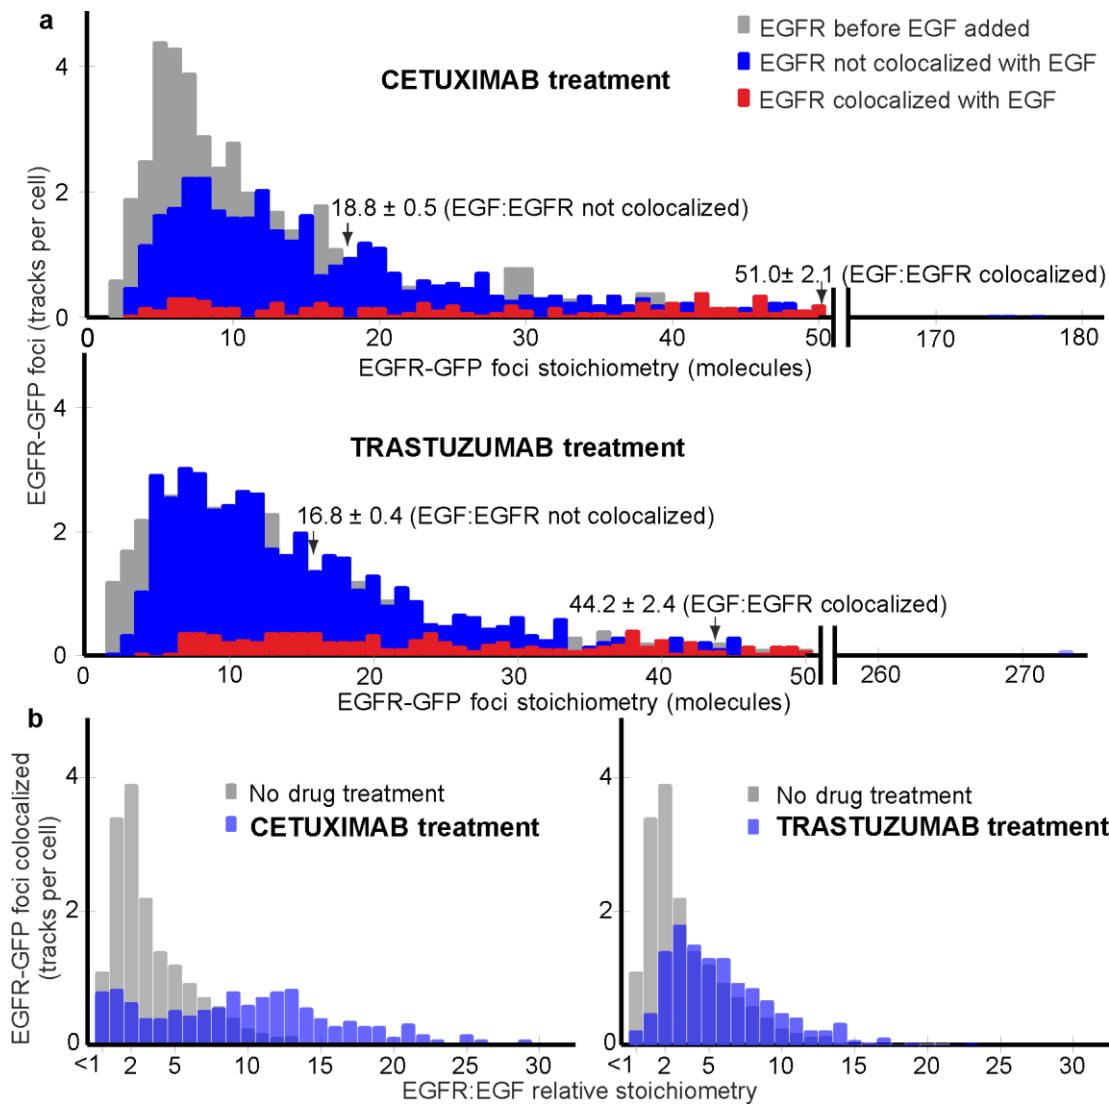

285  
286 **Figure 5. Effect of cetuximab or trastuzumab on EGFR foci stoichiometry.** (a) Distribution of EGFR  
287 foci stoichiometry for cells treated with cetuximab or trastuzumab, showing pre (grey) and post EGF  
288 addition for EGFR-EGF (red) and isolated EGFR (blue) foci, data collated across 60 min EGF incubation  
289 time, mean and s.e.m. indicated (arrows). (b) EGFR:EGF relative stoichiometry of EGFR-EGF foci for  
290 drug-treated cells (blue) contrasted against no drug treatment (grey). Number of cells per dataset in the  
291 range  $N = 10 - 117$ .

292  
293 **EGF can trigger formation of larger EGFR heteroclusters.** Tracking of EGFR foci indicated complex  
294 mobility in the plasma membrane: Brownian diffusion up to tracking time intervals of  $\sim 100$  ms (Fig. 6a),  
295 transiently confined diffusion into zones of diameter  $\sim 400$ -500nm at time intervals of  $\sim 100$ -600 ms, and  
296 Brownian diffusion for time intervals  $> 600$  ms (shown indicatively in Supplementary Fig. 7a for the  
297 average mean square displacement up to time intervals of several seconds) similar to complicated patterns  
298 of diffusion observed previously for membrane proteins interacting with the cytoskeleton<sup>55</sup>. Using the  
299 initial gradient of the mean square displacement with respect to tracking time interval for each track we  
300 determined the apparent microscopic diffusion coefficient and correlated this against EGFR foci  
301 stoichiometry. We used a simple model based on the Stokes-Einstein relation, that the cross-sectional area  
302 of an EGFR cluster parallel to the plasma membrane scales linearly with the number of EGFR dimers

present. The model assumes that the diffusion coefficient  $D$  is given by  $k_B T / \gamma$  where  $k_B$  is Boltzmann's constant,  $T$  the absolute temperature and  $\gamma$  the frictional drag of the whole EGFR cluster in the membrane. The frictional drag is proportional to the effective radius of the EGFR cluster, which implies that  $D$  is proportional to the reciprocal of the square root of the stoichiometry. Our model results in reasonable agreement for data corresponding to pre and post EGF incubation (Fig. 6b).

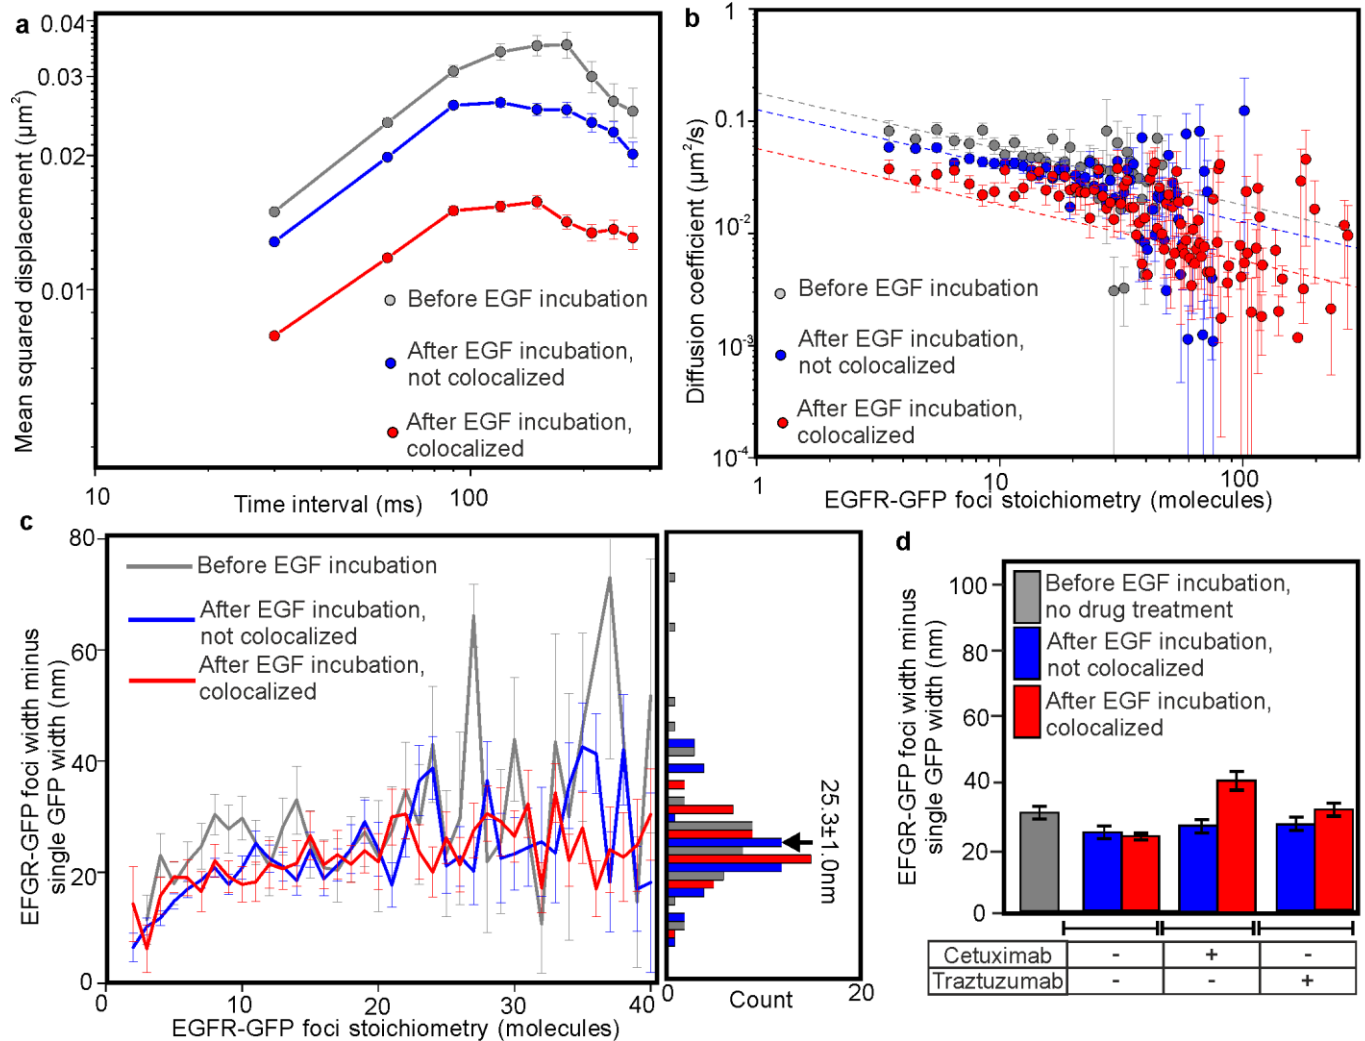

**Figure 6. EGFR foci mobility depends on stoichiometry and EGF binding.** (a) Log-log plot for average mean squared displacement for time intervals of 300 ms or less, and (b) log-log plot for apparent microscopic diffusion coefficient  $D$  with EGFR stoichiometry  $S$ , fits shown to Stokes-Einstein model assuming  $D \sim S^{-1/2}$  (dashed lines). (c) EGFR-GFP foci width minus the width of a single GFP vs. stoichiometry, and associated histogram, mean and s.e.m. for all datasets combined indicated (arrow). PreEGF incubation (grey, from  $N=770$  foci, taken from  $N=19$  cells) and post EGF incubation for EGFR-EGF (red, from  $N=1,969$  foci, taken from number  $N=117$  cells) and isolated EGFR (blue, from  $N=1,741$  foci, taken from  $N=117$  cells) foci shown, s.e.m. error bars. (d) Histograms EGFR-GFP mean foci width minus width of a single GFP. Pre EGF incubation for cells untreated with drugs (grey, from  $N=1,252$  foci, taken from  $N=19$  cells); cetuximab-treated cells post EGF incubation for EGFR-EGF (red, from  $N=151$  foci, taken from  $N=10$  cells) and isolated EGFR (blue, from  $N=1,253$  foci, taken from  $N=10$  cells) foci shown; trastuzumab-treated cells post EGF incubation for EGFR-EGF (red, from  $N=263$  foci, taken from

323 N=27 cells) and isolated EGFR (blue, from N=1,479 foci, taken from N=27 cells) foci shown; s.e.m. error  
324 bars.

325  
326 We quantified EGFR-GFP foci widths by performing intensity profile analysis on background-corrected  
327 pixel values over each foci image<sup>56</sup>, and compared this with measurements obtained from single GFP *in*  
328 *vitro*, as a function of foci stoichiometry  $S$  (Fig. 6c). In all cases the mean EGFR-GFP foci width was  
329 greater than that of single GFP, which increased with the number of EGFR-GFP molecules present,  
330 consistent with a spatially extended structure. The dependence of this increase could be modelled with a  
331 heuristic power law relation  $S^a$  with optimized exponent  $a$  of  $0.27 \pm 0.04$  (s.e.m.) showing no dependence  
332 with EGF activation (Supplementary Fig. 7b), with a mean for all pooled data of  $25.3 \pm 1.0\text{nm}$  (s.e.m.). At  
333 the low end of  $S$  the increase in foci width minus single GFP width was  $\sim 11\text{-}12\text{nm}$ , while at the high end,  
334 corresponding in some cases to several hundred EGFR per focus, the increase in width was  $30\text{-}40\text{nm}$ . Foci  
335 widths indicated no significant differences upon addition of either cetuximab or trastuzumab prior to  
336 addition of EGF ( $P > 0.05$ ), however, we observed an increase of  $\sim 50\%$  for EGFR-EGF foci for cetuximab-  
337 treated cells ( $P < 0.001$ ) (Fig. 6d). Cells treated with cetuximab or trastuzumab exhibited a similar shape for  
338 the mean square displacement vs. time interval relation to untreated cells (Fig. 7a). Both treatment groups  
339 also showed reasonable agreement to a Stokes-Einstein model for diffusion, for before and after addition of  
340 EGF (Fig. 7b).

341 We used  $D$  to directly estimate the physical diameter of EGFR foci. A full analytical treatment  
342 models diffusion of membrane protein complexes as cylinders with their long axis perpendicular to the  
343 membrane surface<sup>57</sup> requiring precise knowledge of local membrane thickness, however, here we  
344 simplified the analysis by calculating the diameter of the equivalent Stokes sphere to generate indicative  
345 values of drag length scale. We approximated the frictional drag by  $3\pi\eta d$  where  $d$  is the sphere diameter,  
346 assuming that drag contributions from the extracellular and cytoplasmic components are negligible since  
347 the kinematic viscosity  $\eta$  in the plasma membrane is higher by 2-3 orders of magnitude<sup>58</sup>. Using a  
348 consensus value of  $\sim 270$  cP for the effective plasma membrane viscosity, estimated from human cell lines  
349 using high precision nanoscale viscosity probes<sup>59</sup>, indicates a mean Stokes diameter of  $\sim 40\text{-}60\text{nm}$  for  
350 isolated EGFR. EGFR-EGF foci had a mean Stokes diameter of closer to  $\sim 90\text{nm}$ , reduced back to the level  
351 for isolated EGFR to within experimental error upon treatment of cetuximab or trastuzumab (Fig. 7c).

352 We then used Stokes-Einstein fits to determine the Stokes diameter corresponding to the EGFR  
353 dimer (i.e. a stoichiometry of precisely 2), which indicated values in the range  $\sim 7\text{-}10\text{nm}$  for isolated EGFR  
354 across the cetuximab, trastuzumab and untreated cell datasets (Fig. 7d), broadly consistent with  
355 expectations from the crystal structure of dimeric EGFR<sup>17,18</sup>. EGF-EGFR foci corresponding to an EGFR  
356 stoichiometry of 2 had Stokes diameters of  $\sim 30\text{nm}$ , which were unaffected by cetuximab but reduced by a  
357 factor of  $\sim 2$  almost to the level of isolated EGFR dimers by trastuzumab (Fig. 7d).

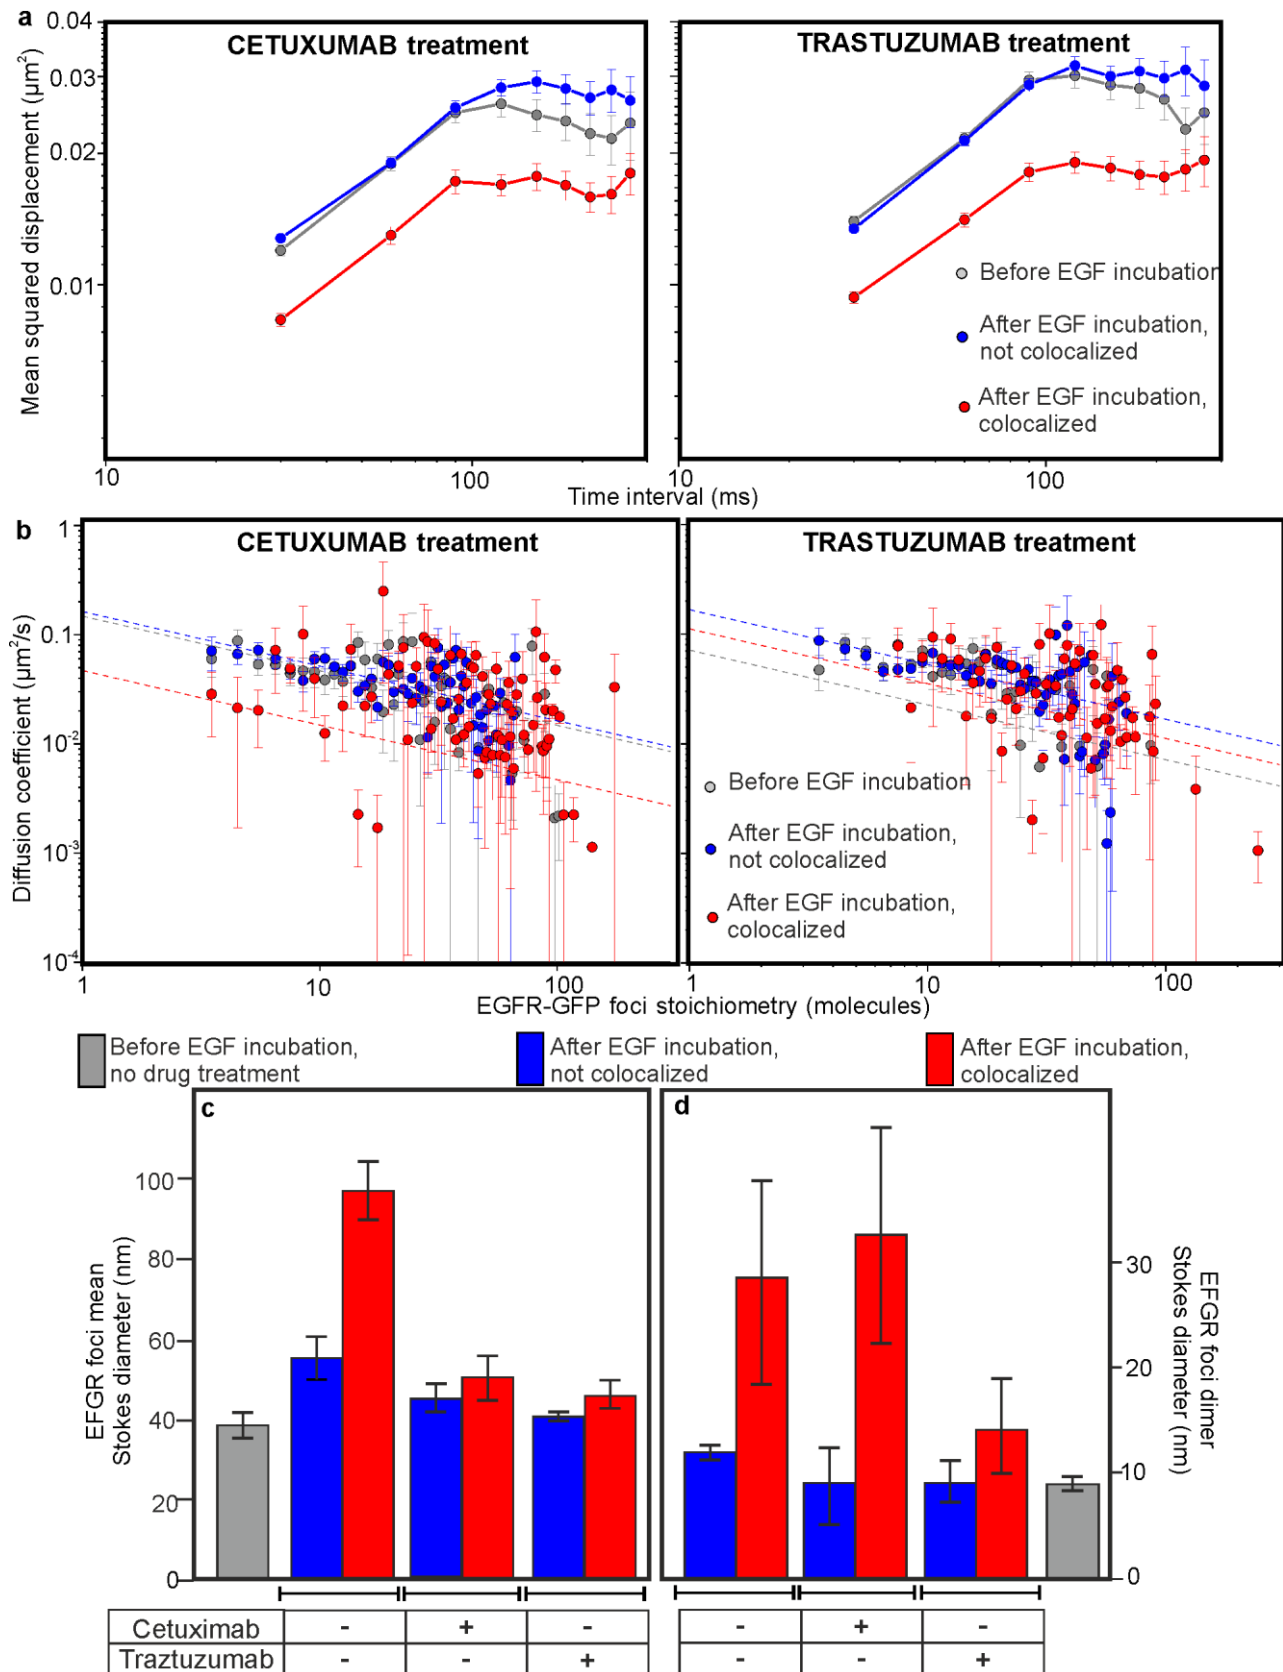

358

359 **Figure 7. EGFR mobility can be affected by EGF inhibitors.** (a) Log-log plots for average mean  
 360 squared displacement for time intervals of 300 ms or less, and (b) log-log plots for variation of apparent  
 361 microscopic diffusion coefficient  $D$  with EGFR stoichiometry  $S$ , fits shown to Stokes-Einstein model



362 assuming  $D \sim S^{-1/2}$  (dashed lines) for cetuximab- and trastuzumab-treated cells. (c) Histogram of mean  
363 Stokes diameter, and (d) equivalent diameter values extrapolated for EGFR dimeric foci using same  
364 datasets as for Fig. 6d, s.e.m. error bars.

365  
366 The Stokes diameter for an EGFR cluster is a measure of visible EGFR-GFP content plus any  
367 unlabelled associated protein contributing to overall frictional drag. Here, the proportion of non-fluorescent  
368 EGFR is low. However, other studies have suggested that EGFR forms heterocomplexes with other RTK  
369 receptors<sup>31-33,60</sup>. Here, we observe that treatment with the HER2-binder trastuzumab results in a similar  
370 measured Stokes diameter for EGF-EGFR foci to that for isolated EGFR dimers, suggesting that HER2  
371 may form heterocomplexes with EGFR following EGF binding (Fig. 8, left panel). Also, since the mean  
372 Stokes diameter of EGFR-EFR foci of ~90nm corresponds to a stoichiometry ~32 EGFR molecules, i.e. 16  
373 EGFR dimers, then the average diameter associated with a single EGFR dimer which can account for the  
374 same cluster area is ~22nm, greater than the measured diameter of an EGFR dimer from crystal  
375 structures<sup>17,18</sup> by a factor of ~2. In other words, the observed Stokes diameter could be explained if EGFR-  
376 GFP dimers associate in a 1:1 relative stoichiometry with unlabelled HER2 dimers of similar same size and  
377 structure.

378 An additional phenomenon to consider is plasma membrane invagination as EGFR clusters grow,  
379 ultimately culminating in a clathrin-coated vesicle inside the cytoplasm. Since the visible focus that we  
380 detect in TIRF corresponds to the GFP localization pattern in the invaginated membrane projected laterally  
381 onto our camera detector then its apparent visible diameter might appear to approach an asymptotic plateau  
382 with respect to EGFR-GFP stoichiometry (Fig. 8, right panel), which is broadly what we observed  
383 (Fig. 6c).

384

### Preformed oligomeric homocluster/activated heterocluster model for EGF receptor platform growth

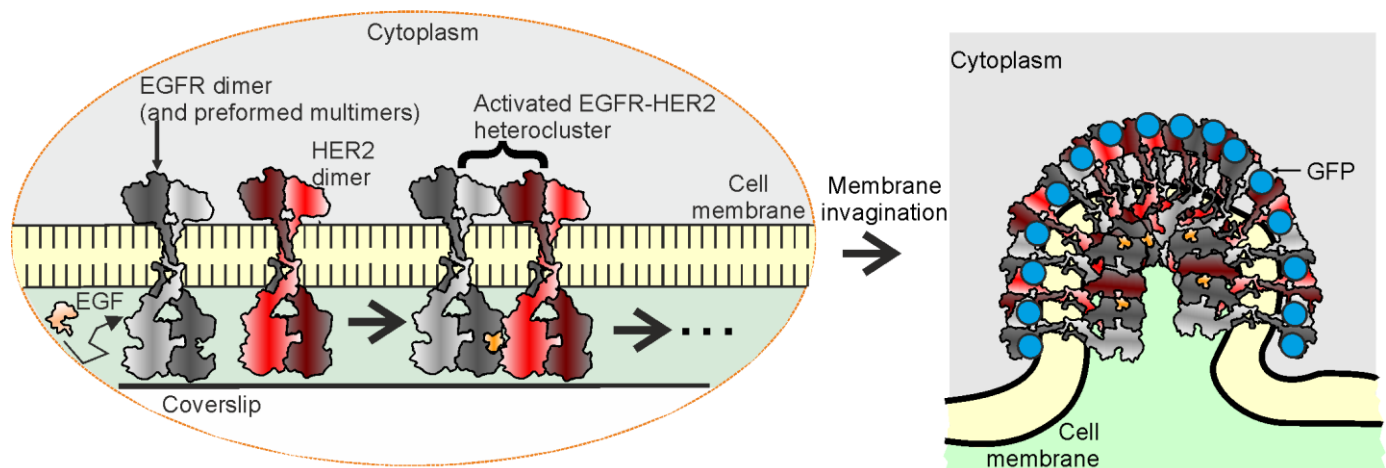

385

386 **Figure 8. Activated EGFR nanoclusters grow in platforms containing heteroclusters of EGFR and**  
387 **HER2.** Schematic illustrating how HER2 and EGFR dimers may be associated following EGFR activation  
388 by EGF (left panel) and how further oligomerization may result in local membrane invagination to form  
389 hetero receptor ‘platforms’ of several tens of nm diameter.

390

### 391 Discussion

392 In summary, data acquired using genetics, cell biology, biochemical and biophysical techniques, in  
393 particular single-molecule imaging with tracking to 40nm precision and quantitative molecular and  
394 mobility analysis on live bowel carcinoma cells, suggest that preformed homo-oligomeric EGFR is present  
395 in the plasma membrane prior to EGF activation, comprising predominantly clusters of EGFR dimers.  
396 These observations are consistent with negative cooperativity of EGF binding to EGFR. Using a GFP  
397 probe on EGFR in combination with the spectrally distinct TMR tagged to EGF enabled unparalleled  
398 insight into the molecular stoichiometry, mobility and kinetics of single functional EGFR clusters in their  
399 pre and post activated states. Our observations indicate that the most prevalent EGFR complex in the  
400 absence of bound EGF is a hexamer, though with higher order oligomers also present extending to clusters  
401 containing up to ~90 molecules. We find that activation by EGF results in a shift to higher cluster  
402 stoichiometry, contrary to earlier speculation from experiments in which just EGF was fluorescently  
403 labelled suggesting tetrameric EGFR is the most likely multimeric state<sup>36</sup>. We observe that the action of  
404 cetuximab and trastuzumab, commonly used anti-cancer drugs, results in increases in the mean EGFR  
405 content of receptor clusters by a factor of 3-5. In addition, our findings suggest that EGF activation  
406 generates hetero clusters of EGFR and HER2, a response which results in the formation of super-clusters  
407 whose effective diameter is up to ~90nm.

408 Our findings clearly indicate that EGFR is clustered both before and after EGF activation,  
409 consistent with observations from earlier AFM imaging experiments which probed the surface morphology  
410 of the human lung adenocarcinoma cell line A549, known to have high levels of EGFR expression in the  
411 cell membrane<sup>61</sup>. This study suggested that half of the EGFR clusters quantified had a diameter in the  
412 range 20-70nm in the pre-activated state, and 35-105nm post activation, comparable with our light  
413 microscopy measurements. However, we find important differences with respect to recent single-molecule  
414 studies of EGFR activation<sup>27,34-37</sup>. We observe no significant monomeric population of EGFR before or

415 after EGFR activation, despite having the sensitivity to detect single GFP under our imaging conditions,  
416 though we do observe the presence of single EGF-TMR molecules associated with multimeric EGFR  
417 clusters. Two key improvements in our study are that: (i) we specifically selected a human carcinoma cell  
418 strain with negligible native EGFR expression, whereas earlier single-molecule studies utilised cell lines  
419 likely to have much higher EGFR expression; (ii) unlike earlier studies we have definitive spatial  
420 information concerning the localization of EGFR and EGF simultaneously and so have a high level of  
421 confidence concerning the effects of EGF binding on the stoichiometry of specific individual EGFR foci.  
422 In single-molecule experiments in which EGFR is labelled with a fluorescent protein reporter for which  
423 there is some expression of native EGFR even if low<sup>34,37</sup> then apparently monomeric EGFR foci may  
424 inevitably be detected even if a functional cluster has a higher stoichiometry, due to mixing of unlabelled  
425 and labelled EGFR molecules. In single-molecule experiments in which labelled EGF is not imaged  
426 simultaneously with labelled EGFR<sup>27,35,36</sup> then no direct inference can be made as to the relative  
427 stoichiometry of associated clusters.

428 The lack of evidence in our experiments for a monomeric EGFR population coupled to a distinct  
429 peak of 2:1 for the EGFR:EGF relative stoichiometry as determined on a unique cluster-by-cluster basis  
430 provides clear evidence in support of negatively cooperative binding of EGF to an EGFR dimer. The peak  
431 value of 6 EGFR molecules per focus before EGF activation that we observe cannot be explained by a  
432 model as proposed previously<sup>36</sup> which suggested that face-to-face dimers associate with the EGFR dimer  
433 interface between back-to-back dimers to generate higher order oligomeric complexes; analysis of the  
434 steady state solution for this model predicts a most likely stoichiometry of 4 EGFR per focus. Instead, a  
435 more likely state of 6 molecules (and higher after activation) suggests a more complex mechanism in  
436 which additional EGFR molecules result in greater stability for the overall cluster. This begs a question of  
437 what is the driving force behind cluster formation, which we do not directly address here. However, there  
438 is evidence from other studies that forces associated with molecular crowding in the membrane may result  
439 in oligomerization of integrated membrane proteins and the appearance of complex cytoskeletal and  
440 clathrin pit morphologies<sup>34,55,62-64</sup>. Ionic protein-lipid interactions<sup>65</sup> and direct protein-protein interactions<sup>33</sup>  
441 have also been implicated as contributory factors towards EGFR cluster generation.

442 Earlier work on heterocomplex formation in the Erb receptor family has suggested that EGFR and  
443 HER2 associate<sup>31,34</sup>, however, there are discrepancies in the interpretations of experimental data as to  
444 whether this association is before or after EGF activation. Our observations suggest that heterocomplex  
445 formation is most likely following EGF activation of EGFR. The physiological role of heterocomplex  
446 formation is unclear. HER2 is known to act as coreceptor but has no known direct ligand. However, upon  
447 transactivation (i.e. following activation of EGFR by EGF) it exhibits the highest of all kinase activities  
448 across the ErbB family<sup>66</sup>, thereby augmenting signalling efficiency. The mobility of heterocomplexes may  
449 potentially enable a spread of the signal across the surface of the cell, especially if HER2 molecules were  
450 to turn over between different EGFR complexes, however, this hypothesis remains to be tested. One  
451 consequence for having HER association post EGF binding is that the signal response at the level of the  
452 whole cell is more likely to be distinctly binary (i.e. highly biphasic) since the augmentation of the  
453 response due to HER2 association after activation results in a very high and rapid signal response. Our  
454 findings of post activation heterocomplex formation may suggest potential new strategies for anti-cancer  
455 drug design. For example, although there are anti-cancer drugs already established which bind specifically  
456 to HER2, one new strategy could be to target the specific interaction interfaces between HER2 and EGFR

457 directly. Alternatively, it may also be valuable to explore new strategies to disrupt the oligomeric nature of  
458 the EGFR receptors before EGF activation.

## 460 **Methods**

461  
462 **Strain construction.** We screened all ~100 colorectal cancer cell lines from the Cancer and  
463 Immunogenetics Laboratory (Weatherall Institute of Molecular Medicine, Oxford University, U.K.)  
464 for EGFR mRNA using available microarray data<sup>42</sup> (Supplementary Fig. 1) and selected three  
465 preliminary lines (SW620, COLO320HSR and COLO741) on the basis of negligible native EGFR  
466 expression levels prior focussing on SW620 (COLO741 was found to be a melanoma line and  
467 COLO320HSR exhibited transfection instability). Total protein levels were estimated from cell lysates  
468 prepared from pellets using a radio immunoprecipitation assay lysis buffer supplemented with Roche  
469 cOmplete Mini ethylenediaminetetraacetic acid free protease inhibitor cocktail and Roche PhosSTOP  
470 phosphatase inhibitor cocktail. Total protein concentration was estimated using Thermo Scientific™  
471 Pierce™ bicinchoninic acid Protein Assay Kit referenced against known concentrations of BSA. EGFR  
472 protein quantification was performed with western blotting, including cell lines with intermediate levels of  
473 EGFR expression as positive controls, probing nitrocellulose membranes with anti-EGFR mouse  
474 monoclonal antibody (1:1000, clone 1F4, Cell Signalling Technology®) and anti-β-tubulin mouse  
475 monoclonal antibody (1:1000, Sigma-Aldrich®) prepared in TBS-T, 5% milk and incubated overnight at  
476 4°C. After the washing, membranes were incubated with secondary antibody (1h, room temperature) using  
477 a polyclonal Rabbit anti-Mouse antibody conjugated to horseradish peroxidase (Dako) diluted at 1:10,000  
478 and 1:100,000 for respectively EGFR and β-tubulin detection prior to Amersham Biosciences enhanced  
479 chemiluminescence (ECL) exposure.

480 Plasmid perbB1-EGFP-N1 (donated by Philippe Bastiaens, Max Planck Institute of Molecular  
481 Physiology, Dortmund, Germany) was used for transformations, which comprised an insertion of the  
482 human *EGFR* gene into the enhanced GFP Clontech backbone, pEGFPN1, plus selectable kanamycin  
483 (*kan*) resistance markers for bacterial/eukaryotic vectors. Competent *E. coli* cells were transformed with  
484 pEGFR-EGFP following the Invitrogen manufacturer's protocol and plasmid DNA purified using the  
485 QIAGEN Plasmid Mini Kit. The concentration of purified DNA was determined using a Thermo Scientific  
486 NanoDrop™ 1000 Spectrophotometer at 230nm wavelength. SW620 cells were transfected with pEGFR-  
487 EGFP using Invitrogen's cationic lipid transfection formulation, Lipofectamine® LTX and Plus™ reagent.  
488 1 day pre transfection 200,000 cells in 1ml growth medium were seeded into each well of a 12-well plate;  
489 the following day DNA-lipid complexes were prepared according to the manufacturer's instructions. For  
490 each well we added 2µg plasmid DNA, 200µl Invitrogen Opti-MEM® I Reduced Serum Medium, 1µl Plus  
491 Reagent and 6µl of Lipofectamine LTX. DNA-lipid complexes were added dropwise to the cells then  
492 placed in a 5% CO<sub>2</sub> 37 °C incubator and the media changed after 5h to the usual cell media. The following  
493 day cells were trypsinized by trypsinization and reseeded onto 15cm plates in their usual growth media  
494 Gibco® Dulbecco's modified eagle medium (DMEM) supplemented with 4.5g/l glucose, pyruvate, L-  
495 glutamine and phenol red plus 2µg/ml Gibco™ Geneticin® (G418 Sulphate) selection antibiotic. Once  
496 colonies were visible by naked eye, these were isolated using a silicon Cloning cylinder (Corning®),  
497 harvested using trypsin and transferred in a 12-well plate. Transgene expression was confirmed by three

498 different methods of imaging live cells directly with confocal microscopy, imaging immunofluorescently  
499 stained fixed cells with confocal microscopy, and western blotting.

500 **Nanobody preparation.** IgG antibodies to EGF and anti-EGF rabbit anti-mouse polyclonal IgG  
501 (Molecular Probes) were digested by papain, confirmed by migration of 28-30kDa and 25kDa molecular  
502 weight proteins under reducing conditions, corresponding to reduced Fc and Fab, respectively. Fab  
503 nanobodies were purified from the digest using protein A immobilized within a spin column. The  
504 completeness of IgG digestion and Fab purification were evaluated by measuring absorbance at 280nm  
505 wavelength using a Thermo Scientific NanoDrop spectrophotometer. Following purification of the digest  
506 a protein band at 25kDa only was seen in the protein A flow-through under denaturing and reducing  
507 conditions for both antibodies, consistent with reduced Fab.

508 **Fluorescence microscopy.** For confocal microscopy we used a Zeiss inverted Axio Observer Z1  
509 microscope with LSM 510 META scanning module and Plan-Aprochromat 63x 1.40NA oil immersion  
510 DIC M27 objective lens, enabling simultaneous imaging of green and red colour channels: excitation path  
511 used 488nm wavelength argon ion laser; first detection channel contained a 565nm wavelength dichroic  
512 beamsplitter and 505nm longpass emission filter for GFP, second channel collected transmitted light to  
513 produce a DIC image. Cells were grown in Corning 75 cm<sup>2</sup> treated plastic cell culture flasks in a  
514 humidified incubator at 37 °C with 5% carbon dioxide. Once cells were 70-100% confluent they were  
515 subcultured by enzymatic disaggregation with trypsin. 2-7 days prior to imaging, 150,000-300,000  
516 SW620-EGFR-GFP cells were seeded onto Ibidi  $\mu$ -dish 35mm, high glass bottom using their normal  
517 culture medium. SW620-EGFR-GFP cells were either seeded in DMEM containing phenol red, then  
518 changed to DMEM with addition of 4.5g/l glucose, L-glutamine, HEPES, without phenol red, and  
519 supplemented with 10% FBS, 100 units/ml of penicillin and 100  $\mu$ g/ml of streptomycin, or SW620:EGFR-  
520 GFP cells were seeded directly into DMEM without phenol red. Prior to imaging the media was changed to  
521 Molecular Probes® Live Cell Imaging Solution. All media used for SW620-EGFR-GFP cells were  
522 supplemented with 1.5mg/ml of G418 sulfate.

523 For immunofluorescent characterization we harvested SW620-EGFR-GFP cells 48h prior to  
524 fixation at density of ~50,000 per well seeded into Ibidi  $\mu$ -Slide VI0.4, cultured in DMEM without phenol  
525 red, supplemented with 4.5g/l glucose, L-glutamine, HEPES 10% FBS and 100 units/ml of penicillin and  
526 100 $\mu$ g/ml streptomycin, 1.5mg/ml of G418. Cells were fixed with 4% formaldehyde at room temperature  
527 for 10min and washed. Non-specific antibody adsorption was blocked with 10% FBS in PBS for  
528 10-20min. Primary antibodies were EGFR (D38B1) XP rabbit monoclonal 4267P (Cell Signaling  
529 Technology, 1:50 dilution) and anti-GFP chicken IgY (H+L) (Cell Signaling Technology, 1:400 dilution)  
530 diluted in PBS with 10% FBS and 0.1% saponin overnight at 4 °C. Each well was washed with 10% FBS  
531 and incubated with secondary antibodies, DyLight 633 goat anti-rabbit immunoglobulin G (IgG) highly  
532 cross adsorbed (PN35563, Thermoscientific), dilution 1:200, and Alexa Fluor 633 goat anti-chicken IgG  
533 (H+L) 2 mg/ml (Invitrogen) diluted in PBS with 10% FBS and 0.1% saponin. Channels were washed with  
534 PBS and Sigma Aldrich Mowiol 4-88 was added to solidify overnight. GFP, DyLight 633 or Alexa Fluor  
535 633 and 4',6-diamidino-2-phenylindole (DAPI) were individually illuminated and scanned. Transmitted  
536 light images were scanned simultaneously with GFP. GFP was excited as for live cell imaging, while  
537 DyLight 633 and Alexa Fluor 633 were excited by a 633nm HeNe laser and detection beam path contained  
538 a 565nm secondary dichroic beamsplitter and 650nm longpass filter.

539 For TIRF microscopy, a bespoke dual-colour single-molecule microscope was modified from a previous  
540 design<sup>47,67,68</sup> equipped with nanostage (Mad City Labs), samples imaged at 37 °C in a humidified stage top  
541 incubator supplemented with 5% CO<sub>2</sub> (INUB-LPS, Tokai Hit). We used excitation sources of an Elforlight  
542 B4-40 473nm 40mW diode laser and Oxxius SLIM 561nm 200mW diode-pumped solid-state laser,  
543 independently attenuated and recombined into a common optical path prior to polarization circularization  
544 using an achromatic  $\lambda/4$  plate before entering a Nikon Eclipse-Ti inverted microscope body. An  
545 achromatic doublet lens mounted onto a translation stage controlled the angle of incidence into the  
546 objective lens to generate TIRF via a Semrock 488/561nm BrightLine® dual-edge laser-flat dichroic beam  
547 splitter into a Nikon CFI Apo TIRF 100x NA1.49 oil immersion objective lens. Our imaging system  
548 enabled simultaneous GFP and TMR detection across a laser excitation field of full width at half maximum  
549 20 $\mu$ m laterally, intensity 1kW/cm<sup>2</sup> and set depth of penetration ~100nm. Continuous fluorescence  
550 emissions were sampled at 30ms per frame and split into green/red channels via a 488/561nm dual-pass  
551 dichroic mirror (Semrock) and imaged onto two 512x512 pixel array EMCCD cameras (Andor, iXon+  
552 DU-897 and iXon DU-887 for green and red respectively, piezoelectrically cooled to -70°C) at  
553 ~50nm/pixel magnification, via Semrock 561nm StopLine® single notch and Chroma 473nm notch filters.  
554 Cells were seeded and grown in culture medium onto glass-bottomed Petri dishes at 37 °C in humidified  
555 5% CO<sub>2</sub>, prior to imaging exchanging to Molecular Probes® Live Cell Imaging Solution supplemented  
556 with G418 sulfate. When appropriate, EGF-TMR was added to stimulate activation, in addition to EGF  
557 inhibitors of cetuximab or trastuzumab (Molecular Probes) at a final concentration of 100 ng/ml.  
558 SW620:EGFR-GFP, and native SW620 cells with negligible endogenous EGFR as negative control, were  
559 imaged on plasma cleaned glass coverslips (25mm×75mm No. 1.5 D263M Schott) covered by a sterile  
560 Ibidi sticky-Slide VI0.4 in a laminar flow hood. 48h prior to imaging cells at a density of ~100,000 in a  
561 50 $\mu$ l volume of DMEM without phenol red supplemented with 10% FBS, 100 units/ml Penicillin and  
562 100 $\mu$ g/ml Streptomycin, were seeded into each channel of the slide. Prior to imaging the media was  
563 changed to DMEM without phenol red supplemented with 100 units/ml Penicillin and 100 $\mu$ g/ml  
564 Streptomycin but without the addition of FBS, supplemented with 1.5mg/ml G418 sulfate, serum starving  
565 the cells for ~12-24h prior to imaging to remove serum EGF. Although we cannot entirely exclude residual  
566 amounts of non-EGF EGFR ligands we checked the SW620 cell line for secretion of the most common  
567 ligands, indicating: EGF: not expressed; TGFA: low level expression; HBEGF: low level expression;  
568 AREG: not expressed; BTC: not expressed; EREG: not expressed; EPGN: no data available. Fluorescence  
569 image sequences and a brightfield image were acquired immediately after adding EGF-TMR (Molecular  
570 Probes) where appropriate to a final concentration of 100ng/ml, acquiring images at 5min intervals up to  
571 60min.

572 For single-molecule *in vitro* TIRF we used surface-immobilized GFP or EGF-TMR via anti-GFP or  
573 anti-EGF antibodies (Molecular Probes) respectively followed by BSA to passivate the surface prior to  
574 washing off<sup>69</sup>. Whole IgG has in principle two binding sites and to test if two fluorophores may be seen in  
575 the same diffraction-limited fluorescent spot we also prepared an antigen binding fragment (Fab) with only  
576 one binding site. In brief, slides were constructed from Ibidi sticky-Slides VI0.4 and 25mm×75mm No. 1.5  
577 D263M Schott glass coverslip. The coverslip was plasma-cleaned prior the 50 $\mu$ l of whole IgG or Fab  
578 applied to a single channel and incubated at room temperature for 5min. Channel then washed three times  
579 with 120 $\mu$ l of PBS and the remaining surface blocked with 50 $\mu$ l 1mg/ml of BSA for 60min. The channel  
580 was again washed three times with 120 $\mu$ l of PBS and then incubated with 50 $\mu$ l GFP for 7.5min or EGF-  
581 TMR for 4min. Finally the channel was washed five times with 120 $\mu$ l of PBS before applying 50 $\mu$ l  
582 1:10000, 200nm diameter, 4% w/v, Invitrogen Molecular Probes carboxyl latex beads. These beads could  
583 be visualised in brightfield illumination for focussing to avoid using the GFP or TMR itself to focus on  
584 which would result in photobleaching. The slides were left 1-12h to allow latex beads to settle. Automated  
585 detection of fluorescent foci indicated no significant difference between brightnesses (Supplementary Fig.  
586 3b) for the whole IgG or nanobody conjugation methods. We estimated the mean Gaussian sigma width for

587 single GFP fluorescent foci images to be 230nm for GFP, a value which we interpret as the point spread  
588 function width of our imaging system corresponding to a peak emission wavelength of ~500nm.

589 **Foci tracking.** Bespoke code written in MATLAB (Mathworks)<sup>44,47</sup> was used to track single fluorescent  
590 foci in green and red channels to determine spatial localization and calculate integrated foci pixel  
591 intensities and microscopic diffusion coefficients. The centroid of each fluorescent focus is determined  
592 using iterative Gaussian masking to a sub-pixel precision of ~40nm. The focus brightness is calculated as  
593 the sum of the pixel intensities inside a 5-pixel-radius region centred on the centroid, after subtraction of  
594 local background intensity. The signal-to-noise ratio (SNR) for a fluorescent focus is defined as the total  
595 focus intensity per pixel divided by the standard deviation of the background intensity per pixel. When the  
596 SNR for a focus is >0.3, the focus is accepted and fitted with a 2D radial Gaussian function to determine  
597 its Gaussian sigma width. We decided on an SNR threshold level of 0.3 as a compromise between a high  
598 probability for true positive detection but a low likelihood for false positive detection at single-molecule  
599 fluorophore intensity levels. We simulated fluorescent foci as 2D Gaussian functions in bespoke code  
600 written in MATLAB with comparable integrated pixel intensity values and widths as for those measured  
601 experimentally for single GFP/TMR used in the surface-immobilization assays, adding similar levels of  
602 Poisson-distributed noise, and ran these synthetic data through the same foci detection algorithms as for  
603 real experimental data, but exploring a range of SNR detection thresholds. We found that a threshold of 0.3  
604 gave a true position detection probability of approaching 50% over a signal range corresponding to 1-10  
605 fluorophores per focus, but with a false positive detection probability an order of magnitude less.

606 Foci detected in the tracking algorithm in consecutive image frames separated by 5 pixels or less  
607 (approximately the point spread function width of our imaging system), and which are not different in  
608 brightness or sigma width by more than a factor of two, are linked into the same track.

609 **Stoichiometry analysis.** Stoichiometry per fluorescent focus was estimated in bespoke code written in  
610 MATLAB using integrated intensities and step-wise fluorophore photobleaching with Fourier spectral  
611 analysis to determine the brightness of either GFP or TMR during live cell imaging<sup>69</sup>. The brightness of a  
612 single GFP or TMR in our microscope was determined from *in vivo* data and corroborated using *in vitro*  
613 immobilised protein assays. The brightness of tracked foci in live cells followed an approximately  
614 exponential photobleach decay function of intensity with respect to time. Every fluorescent foci as it  
615 photobleaches to zero intensity will emit the characteristic single GFP brightness value,  $I_{GFP}$ , in the case of  
616 EGFR-GFP, and  $I_{TMR}$  in the case of EGF-TMR, given in our case by the modal value of all spot intensities  
617 over time, and can bleach in integer steps of this value at each sampling time point. Estimates for  $I_{GFP}$  and  
618  $I_{TMR}$  were further verified by Fourier spectral analysis of the pairwise distance distribution<sup>69</sup> of all spot  
619 intensities which yielded the same value to within measurement error. The initial intensity  $I_0$  was estimated  
620 by interpolation of the first 3 measured data points in each focus track. Stoichiometries were obtained by  
621 dividing  $I_0$  by of a given focus track by the appropriate single-molecule fluorophore brightness.  
622 Stoichiometry distributions were rendered as Gaussian kernel density estimations<sup>69</sup> using standard  
623 MATLAB routines.

624 **Mobility analysis** For each accepted focus track, the 2D mean square displacement (MSD) was calculated  
625 in bespoke code written in MATLAB from the fitted focus centroid at time  $t$ ,  $(x(t), y(t))$ , assuming a track  
626 of  $N$  consecutive image frames, and a time interval  $\tau = n\Delta t$ , where  $n$  is a positive integer and  $\Delta t$  the frame  
627 integration time<sup>70</sup>:

$$\begin{aligned} MSD(\tau) &= MSD(n\Delta t) = \frac{1}{N-1-n} \sum_{i=1}^{N-1-n} \{ [x(i\Delta t + n\Delta t) - x(i\Delta t)]^2 + [y(i\Delta t + n\Delta t) - y(i\Delta t)]^2 \} \\ &= 4D\tau + 4\sigma^2 \end{aligned}$$

The localisation precision from our tracking algorithm (i.e. on the  $x$ - $y$  image plane) is given by  $\sigma$ , which we estimate as  $40 \pm 20$ nm. The apparent diffusion coefficient  $D$  is estimated from a linear fit to the first three data points in the MSD curve as a function of  $\tau$  (i.e.  $1 \leq n \leq 3$ , corresponding to the linear region of the average MSD vs.  $\tau$  plot) for each accepted track, the fit constrained to pass through a point  $4\sigma^2$  on the vertical axis corresponding to  $\tau = 0$ , allowing  $\sigma$  to vary in the range 20 - 60nm in line with the measured range during the fitting optimisation.

**Colocalization analysis** The extent of colocalization was quantified using foci overlap integration between green and red channels<sup>47</sup> determined by calculating the overlap integral between each green/red pair in bespoke code written in MATLAB, whose centroids were within 5 pixels of each other (i.e. green/red pairs in close proximity). In brief, assuming two normalized, 2D Gaussian intensity distributions  $g_1(x, y)$  and  $g_2(x, y)$ , centered around  $(x_1, y_1)$  with width  $\sigma_1$ , and centred around  $(x_2, y_2)$  with width  $\sigma_2$  for green and red foci respectively, the overlap integral  $v$  can be analytically calculated as<sup>47</sup>:

$$v = \exp\left(-\frac{\Delta r^2}{2(\sigma_1^2 + \sigma_2^2)}\right)$$

where:

$$\Delta r^2 = (x_1 - x_2)^2 + (y_1 - y_2)^2.$$

Our simulations indicate that a green/red foci pair that have identical centroid coordinates can have a measured overlap integral as low as  $\sim 0.75$  due to the finite localization precision of 40nm. Therefore, we used an overlap integral threshold of  $\geq 0.75$  as a criterion for colocalization for the experimental data.

**Modelling the overlap probability of EGFR-GFP foci images.** The probability that two or more fluorescent foci are within the diffraction limit of our microscope was determined in bespoke code written in MATLAB using a previously reported model<sup>47</sup> at foci surface density values observed here. Such overlapping foci are detected as higher apparent stoichiometry foci. The stoichiometry distribution from overlapping foci was modelled by convolving a Poisson distribution generated from the probability of overlap with the expected intensity distribution of an isolated multimer. The latter is obtained by scaling the width of the single fluorophore intensity distribution (Supplementary Fig. 3) by  $S^{1/2}$  where  $S$  is the model stoichiometry. This model stoichiometry was fixed for those shown in Supplementary Fig. 5. For the Monte Carlo model, the model stoichiometry was generated from a population distribution of oligomeric EGFR whose stoichiometry was sampled from a random Poisson distribution with mean value equal to the mode peak value of 6 that we observed. This prediction resulted in a reasonable fit to the experimental distribution with goodness-of-fit  $R^2=0.4923$ .

**Software access.** All our bespoke code written in MATLAB is available from file EGFRanalyser at <https://sourceforge.net/projects/york-biophysics/>.

**Statistical tests and replicates.** Two-tailed Student  $t$ -tests were performing for comparisons between pairs of datasets to test the null hypothesis that data in each was sampled from the same statistical



663 distribution. We assume  $(n_1+n_2-2)$  degrees of freedom where  $n_1$  and  $n_2$  are the number of independent data  
664 points in each distribution and by convention that  $t$  statistic values which have a probability of confidence  
665  $P>0.05$  are statistically not significant. For TIRF each cell was defined as a biological replicate sampled  
666 from the cell population. We chose sample sizes of 10-117 cells per experimental condition which  
667 generated reasonable estimates for the stoichiometry distributions. Technical replicates are not possible  
668 with irreversible photobleaching, nevertheless, the noise in all light microscopy experiments has been  
669 independently characterized for the imaging system used previously.  
670

671 **Acknowledgements.** We thank Philippe Bastiaens, Max Planck Institute of Molecular Physiology,  
672 Dortmund, Germany for donation of plasmid perBB1-EGFP-N1. Work was supported by the EPSRC  
673 (EP/G061009/1), Royal Society (RG0803569, UF110111), BBSRC (BB/F021224/1, BB/N006453/1),  
674 MRC (MR/K01580X/1, PhD studentship) and CRUK (C38302/A12278).

## 676 References

- 677 1. Lemmon, M. A. & Schlessinger, J. Cell Signaling by Receptor Tyrosine Kinases. *Cell* **141**, 1117–  
678 1134 (2010).
- 679 2. Roskoski, R. The ErbB/HER family of protein-tyrosine kinases and cancer. *Pharmacol. Res.* **79**, 34–  
680 74 (2014).
- 681 3. Gertz, J., Siggia, E. D. & Cohen, B. A. Analysis of combinatorial cis-regulation in synthetic and  
682 genomic promoters. *Nature* **457**, 215–8 (2009).
- 683 4. Jorissen, R. N. *et al.* Epidermal growth factor receptor: mechanisms of activation and signalling.  
684 *Exp. Cell Res.* **284**, 31–53 (2003).
- 685 5. Lax, I. *et al.* Localization of a major receptor-binding domain for epidermal growth factor by  
686 affinity labeling. *Mol. Cell. Biol.* **8**, 1831–1834 (1988).
- 687 6. Lax, I. *et al.* Functional analysis of the ligand binding site of EGF-receptor utilizing chimeric  
688 chicken/human receptor molecules. *EMBO J.* **8**, 421–427 (1989).
- 689 7. Roskoski, R. ErbB/HER protein-tyrosine kinases: Structures and small molecule inhibitors.  
690 *Pharmacol. Res.* **87**, 42–59 (2014).
- 691 8. Yarden, Y. & Schlessinger, J. Self-phosphorylation of epidermal growth factor receptor: evidence  
692 for a model of intermolecular allosteric activation. *Biochemistry* **26**, 1434–1442 (1987).
- 693 9. Schneider, M. R. & Wolf, E. The epidermal growth factor receptor ligands at a glance. *J. Cell.*  
694 *Physiol.* **218**, 460–466 (2009).
- 695 10. Zhang, X., Gureasko, J., Shen, K., Cole, P. A. & Kuriyan, J. An Allosteric Mechanism for  
696 Activation of the Kinase Domain of Epidermal Growth Factor Receptor. *Cell* **125**, 1137–1149  
697 (2006).
- 698 11. Downward, J., Parker, P. & Waterfield, M. D. Autophosphorylation sites on the epidermal growth  
699 factor receptor. *Nature* **311**, 483–5
- 700 12. Oda, K., Matsuoka, Y., Funahashi, A. & Kitano, H. A comprehensive pathway map of epidermal

- 701 growth factor receptor signaling. *Mol. Syst. Biol.* **1**, 2005.0010 (2005).
- 702 13. Cohen, S. & Fava, R. A. Internalization of functional epidermal growth factor:receptor/kinase  
703 complexes in A-431 cells. *J. Biol. Chem.* **260**, 12351–12358 (1985).
- 704 14. Lemmon, M. A. *et al.* Two EGF molecules contribute additively to stabilization of the EGFR dimer.  
705 **16**, 281–294 (1997).
- 706 15. Odaka, M., Kohda, D., Lax, I., Schlessinger, J. & Inagaki, F. Ligand-binding enhances the affinity  
707 of dimerization of the extracellular domain of the epidermal growth factor receptor. *J. Biochem.*  
708 **122**, 116–21 (1997).
- 709 16. Domagala, T. *et al.* Stoichiometry, kinetic and binding analysis of the interaction between epidermal  
710 growth factor (EGF) and the extracellular domain of the EGF receptor. *Growth Factors* **18**, 11–29  
711 (2000).
- 712 17. Ogiso, H. *et al.* Crystal structure of the complex of human epidermal growth factor and receptor  
713 extracellular domains. *Cell* **110**, 775–787 (2002).
- 714 18. Garrett, T. P. J. *et al.* Crystal structure of a truncated epidermal growth factor receptor extracellular  
715 domain bound to transforming growth factor alpha. *Cell* **110**, 763–773 (2002).
- 716 19. Cho, H.-S. & Leahy, D. J. Structure of the extracellular region of HER3 reveals an interdomain  
717 tether. *Science* **297**, 1330–3 (2002).
- 718 20. Ferguson, K. M. *et al.* EGF activates its receptor by removing interactions that autoinhibit  
719 ectodomain dimerization. *Mol. Cell* **11**, 507–517 (2003).
- 720 21. Macdonald, J. L. & Pike, L. J. Heterogeneity in EGF-binding affinities arises from negative  
721 cooperativity in an aggregating system. *Proc. Natl. Acad. Sci.* **105**, 112–117 (2008).
- 722 22. Macdonald-Obermann, J. L. & Pike, L. J. The Intracellular Juxtamembrane Domain of the  
723 Epidermal Growth Factor (EGF) Receptor Is Responsible for the Allosteric Regulation of EGF  
724 Binding. *J. Biol. Chem.* **284**, 13570–13576 (2009).
- 725 23. Alvarado, D., Klein, D. E. & Lemmon, M. A. Structural basis for negative cooperativity in growth  
726 factor binding to an EGF receptor. *Cell* **142**, 568–579 (2010).
- 727 24. Liu, P. *et al.* A single ligand is sufficient to activate EGFR dimers. *Proc. Natl. Acad. Sci.* **109**,  
728 10861–10866 (2012).
- 729 25. Lemmon, M. A. Ligand-induced ErbB receptor dimerization. *Exp. Cell Res.* **315**, 638–648 (2009).
- 730 26. Moriki, T., Maruyama, H. & Maruyama, I. N. Activation of preformed EGF receptor dimers by  
731 ligand-induced rotation of the transmembrane domain. *J. Mol. Biol.* **311**, 1011–1026 (2001).
- 732 27. Sako, Y., Minoghchi, S. & Yanagida, T. Single-molecule imaging of EGFR signalling on the  
733 surface of living cells. *Nat. Cell Biol.* **2**, 168–172 (2000).
- 734 28. Martin-Fernandez, M., Clarke, D. T., Tobin, M. J., Jones, S. V & Jones, G. R. Preformed oligomeric  
735 epidermal growth factor receptors undergo an ectodomain structure change during signaling.  
736 *Biophys. J.* **82**, 2415–2427 (2002).
- 737 29. Valley, C. C., Lidke, K. A. & Lidke, D. S. The spatiotemporal organization of ErbB receptors:  
738 insights from microscopy. *Cold Spring Harb. Perspect. Biol.* **6**, (2014).

- 739 30. Clayton, A. H. A. *et al.* Ligand-induced dimer-tetramer transition during the activation of the cell  
740 surface epidermal growth factor receptor-A multidimensional microscopy analysis. *J. Biol. Chem.*  
741 **280**, 30392–30399 (2005).
- 742 31. Tao, R.-H. & Maruyama, I. N. All EGF(ErbB) receptors have preformed homo- and heterodimeric  
743 structures in living cells. *J. Cell Sci.* **121**, 3207–3217 (2008).
- 744 32. Liu, P. *et al.* Investigation of the dimerization of proteins from the epidermal growth factor receptor  
745 family by single wavelength fluorescence cross-correlation spectroscopy. *Biophys. J.* **93**, 684–698  
746 (2007).
- 747 33. Chung, I. *et al.* Spatial control of EGF receptor activation by reversible dimerization on living cells.  
748 *Nature* **464**, 783–787 (2010).
- 749 34. Nagy, P., Claus, J., Jovin, T. M. & Arndt-Jovin, D. J. Distribution of resting and ligand-bound  
750 ErbB1 and ErbB2 receptor tyrosine kinases in living cells using number and brightness analysis.  
751 *Proc. Natl. Acad. Sci.* **107**, 16524–16529 (2010).
- 752 35. Needham, S. R. *et al.* Measuring EGFR separations on cells with ~10nm resolution via fluorophore  
753 localization imaging with photobleaching. *PLoS One* **8**, e62331 (2013).
- 754 36. Needham, S. R. *et al.* EGFR oligomerization organizes kinase-active dimers into competent  
755 signalling platforms. *Nat. Commun.* **7**, 13307 (2016).
- 756 37. Huang, Y. *et al.* Molecular basis for multimerization in the activation of the epidermal growth factor  
757 receptor. *Elife* **5**, e14107 (2016).
- 758 38. Metzger, H. Transmembrane signaling: the joy of aggregation. *J. Immunol.* **149**, 1477–87 (1992).
- 759 39. Chung, C. H. *et al.* Cetuximab-induced anaphylaxis and IgE specific for galactose-alpha-1,3-  
760 galactose. *N. Engl. J. Med.* **358**, 1109–17 (2008).
- 761 40. Li, S. *et al.* Structural basis for inhibition of the epidermal growth factor receptor by cetuximab.  
762 *Cancer Cell* **7**, 301–311 (2005).
- 763 41. Cho, H.-S. *et al.* Structure of the extracellular region of HER2 alone and in complex with the  
764 Herceptin Fab. *Nature* **421**, 756–760 (2003).
- 765 42. Wilding, J. L., McGowan, S., Liu, Y. & Bodmer, W. F. Replication error deficient and proficient  
766 colorectal cancer gene expression differences caused by 3'UTR polyT sequence deletions. *Proc.*  
767 *Natl. Acad. Sci.* **107**, 21058–21063 (2010).
- 768 43. Leake, M. C. *et al.* Stoichiometry and turnover in single, functioning membrane protein complexes.  
769 *Nature* **443**, 355–8 (2006).
- 770 44. Miller, H., Zhou, Z., Wollman, A. J. M. & Leake, M. C. Superresolution imaging of single DNA  
771 molecules using stochastic photoblinking of minor groove and intercalating dyes. *Methods* **88**, 81–8  
772 (2015).
- 773 45. Wollman, A. J. M. & Leake, M. C. Millisecond single-molecule localization microscopy combined  
774 with convolution analysis and automated image segmentation to determine protein concentrations in  
775 complexly structured, functional cells, one cell at a time. *Faraday Discuss.* **184**, 401–24 (2015).
- 776 46. Yu, X., Sharma, K. D., Takahashi, T., Iwamoto, R. & Mekada, E. Ligand-independent dimer

- 777 formation of epidermal growth factor receptor (EGFR) is a step separable from ligand-induced  
778 EGFR signaling. *Mol. Biol. Cell* **13**, 2547–2557 (2002).
- 779 47. Llorente-Garcia, I. *et al.* Single-molecule in vivo imaging of bacterial respiratory complexes  
780 indicates delocalized oxidative phosphorylation. *Biochim. Biophys. Acta* **1837**, 811–24 (2014).
- 781 48. Leake, M. C., Wilson, D., Bullard, B. & Simmons, R. M. The elasticity of single kettin molecules  
782 using a two-bead laser-tweezers assay. *FEBS Lett.* **535**, 55–60 (2003).
- 783 49. Leake, M. C., Wilson, D., Gautel, M. & Simmons, R. M. The elasticity of single titin molecules  
784 using a two-bead optical tweezers assay. *Biophys. J.* **87**, 1112–35 (2004).
- 785 50. Sorkin, A. & Duex, J. E. Quantitative analysis of endocytosis and turnover of epidermal growth  
786 factor (EGF) and EGF receptor. *Curr. Protoc. cell Biol.* **Chapter 15**, Unit 15.14 (2010).
- 787 51. Kirkpatrick, P., Graham, J. & Muhsin, M. Fresh from the pipeline: Cetuximab. *Nat. Rev. Drug*  
788 *Discov.* **3**, 549–550 (2004).
- 789 52. Garnock-Jones, K. P., Keating, G. M. & Scott, L. J. Trastuzumab. *Drugs* **70**, 215–239 (2010).
- 790 53. Abu-Ali, S., Fotovati, A. & Shirasuna, K. Tyrosine-kinase inhibition results in EGFR clustering at  
791 focal adhesions and consequent exocytosis in uPAR down-regulated cells of Head and Neck  
792 cancers. *Mol. Cancer* **7**, 47 (2008).
- 793 54. Abulrob, A. *et al.* Nanoscale imaging of epidermal growth factor receptor clustering: effects of  
794 inhibitors. *J. Biol. Chem.* **285**, 3145–56 (2010).
- 795 55. Bag, N., Huang, S. & Wohland, T. Plasma Membrane Organization of Epidermal Growth Factor  
796 Receptor in Resting and Ligand-Bound States. *Biophys. J.* **109**, 1925–36 (2015).
- 797 56. Wollman, A. J. *et al.* Transcription factor clusters regulate genes in eukaryotic cells. *Elife* **6**, e27451  
798 (2017).
- 799 57. Hughes, B. D., Pailthorpe, B. A. & White, L. R. The translational and rotational drag on a cylinder  
800 moving in a membrane. *J. Fluid Mech.* **110**, 349 (1981).
- 801 58. Fushimi, K. & Verkman, A. S. Low viscosity in the aqueous domain of cell cytoplasm measured by  
802 picosecond polarization microfluorimetry. *J. Cell Biol.* **112**, 719–25 (1991).
- 803 59. López-Duarte, I., Vu, T. T., Izquierdo, M. A., Bull, J. A. & Kuimova, M. K. A molecular rotor for  
804 measuring viscosity in plasma membranes of live cells. *Chem. Commun.* **50**, 5282–5284 (2014).
- 805 60. Yarden, Y. & Sliwkowski, M. X. Untangling the ErbB signalling network. *Nat. Rev. Mol. Cell Biol.*  
806 **2**, 127–137 (2001).
- 807 61. Zhao, W. *et al.* Mapping the resting and stimulated EGFR in cell membranes with topography and  
808 recognition imaging. *Anal. Methods* **6**, 7689–7694 (2014).
- 809 62. Ibach, J. *et al.* Single Particle Tracking Reveals that EGFR Signaling Activity Is Amplified in  
810 Clathrin-Coated Pits. *PLoS One* **10**, e0143162 (2015).
- 811 63. Boggara, M., Athmakuri, K., Srivastava, S., Cole, R. & Kane, R. S. Characterization of the diffusion  
812 of epidermal growth factor receptor clusters by single particle tracking. *Biochim. Biophys. Acta -*  
813 *Biomembr.* **1828**, 419–426 (2013).

- 814 64. Ariotti, N. *et al.* Epidermal growth factor receptor activation remodels the plasma membrane lipid  
815 environment to induce nanocluster formation. *Mol. Cell. Biol.* **30**, 3795–804 (2010).
- 816 65. Wang, Y. *et al.* Regulation of EGFR nanocluster formation by ionic protein-lipid interaction. *Cell*  
817 *Res.* **24**, 959–976 (2014).
- 818 66. Klapper, L. N. *et al.* The ErbB-2/HER2 oncoprotein of human carcinomas may function solely as a  
819 shared coreceptor for multiple stroma-derived growth factors. *Proc. Natl. Acad. Sci. U. S. A.* **96**,  
820 4995–5000 (1999).
- 821 67. Plank, M., Wadhams, G. H. & Leake, M. C. Millisecond timescale slimfield imaging and automated  
822 quantification of single fluorescent protein molecules for use in probing complex biological  
823 processes. *Integr. Biol. (Camb).* **1**, 602–12 (2009).
- 824 68. Reyes-Lamothe, R., Sherratt, D. J. & Leake, M. C. Stoichiometry and architecture of active DNA  
825 replication machinery in *Escherichia coli*. *Science* **328**, 498–501 (2010).
- 826 69. Leake, M. C. *et al.* Stoichiometry and turnover in single, functioning membrane protein complexes.  
827 **443**, 355–358 (2006).
- 828 70. Michalet, X. Mean square displacement analysis of single-particle trajectories with localization  
829 error: Brownian motion in an isotropic medium. *Phys. Rev. E* **82**, 41914 (2010).

830

831

832

833

## Supplementary Information

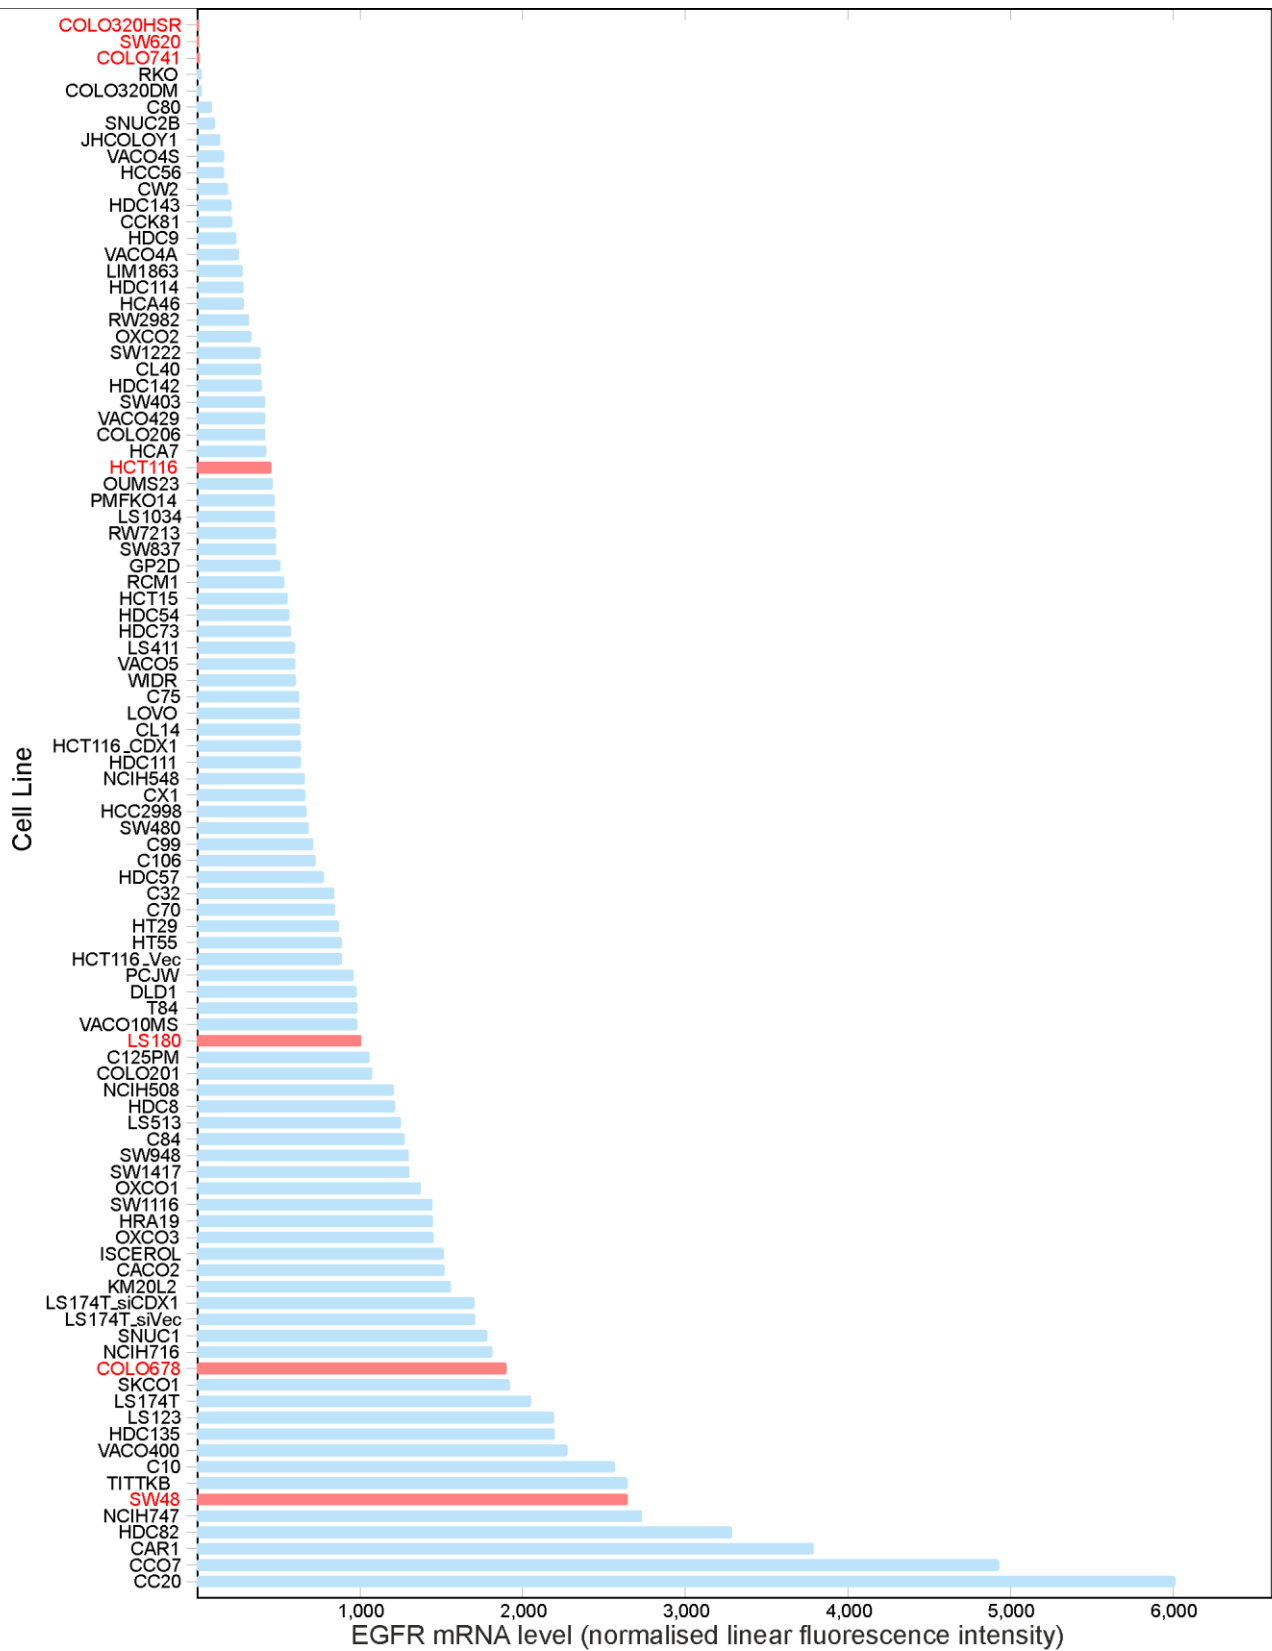

834

835

836

**Supplementary Figure 1 EGFR mRNA expression levels.** Expression levels were quantified for a colorectal cancer cell line panel using Affymetrix U133+2 mRNA microarray data. Measurements

837 indicated three candidate cell lines, SW620, COLO320HSR and COLO741 (labelled in red, top of  
838 panel), as having very low levels of native EGFR expression, as tested in subsequent western blot  
839 analysis in comparison to EGFR-expressing cell lines as positive controls (indicated as red columns,  
840 middle and bottom of panel). Three candidate cell lines with very low or absent levels of EGFR  
841 mRNA (SW620, COLO320HSR, COLO741; Y axis text label in red, top of panel) and a further four  
842 positive controls with medium to high levels (HCT116, LS180, COLO678; indicated as red columns,  
843 middle and bottom of panel), were selected and protein levels confirmed by western blot (Figure 1b).

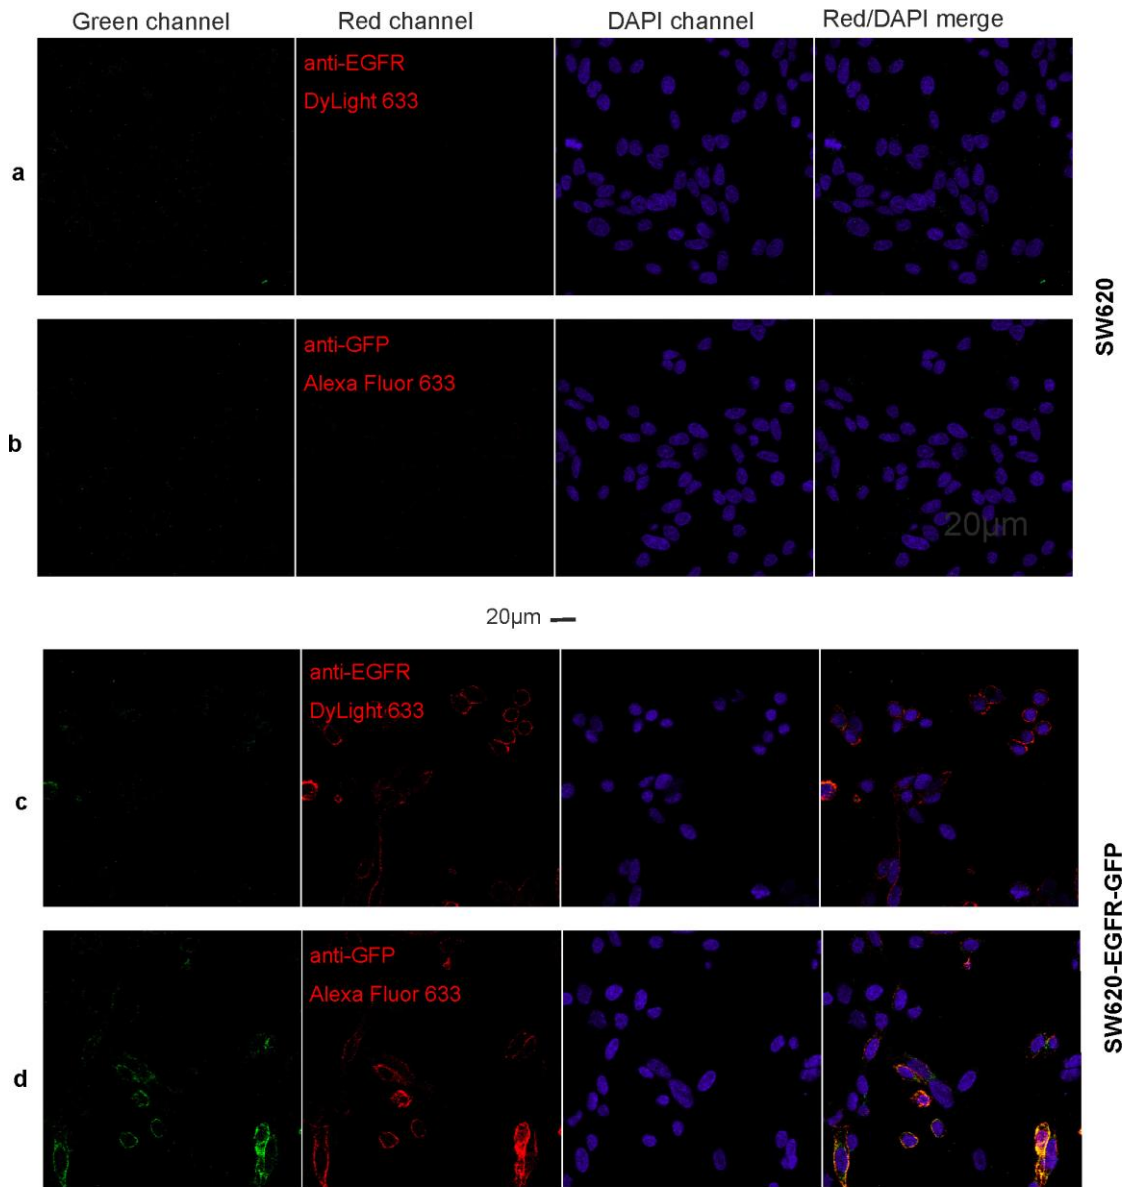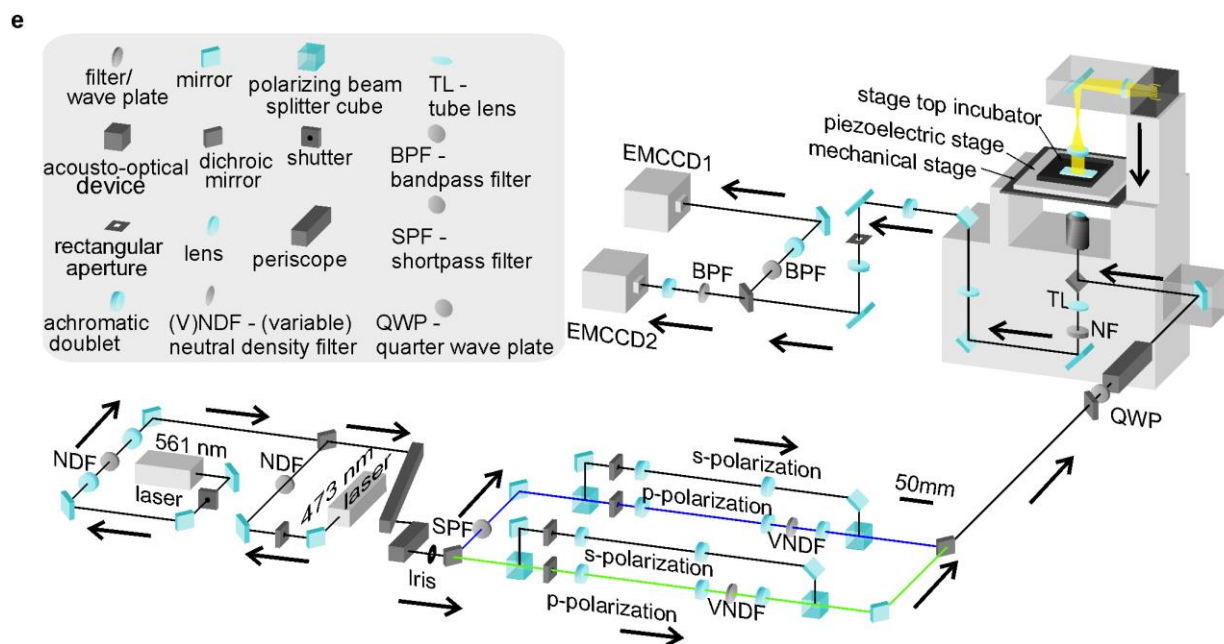



845 **Supplementary Figure 2. Confocal and TIRF characterization.** Confocal microscopy images of fixed  
 846 cells using GFP, anti-GFP immunofluorescence, and DAPI staining: **(a,b)** non-GFP background cell line  
 847 SW620; **(c,d)** SW620-EGFR-GFP; **(e)** optical path diagram of bespoke single-molecule TIRF microscope.

848

849

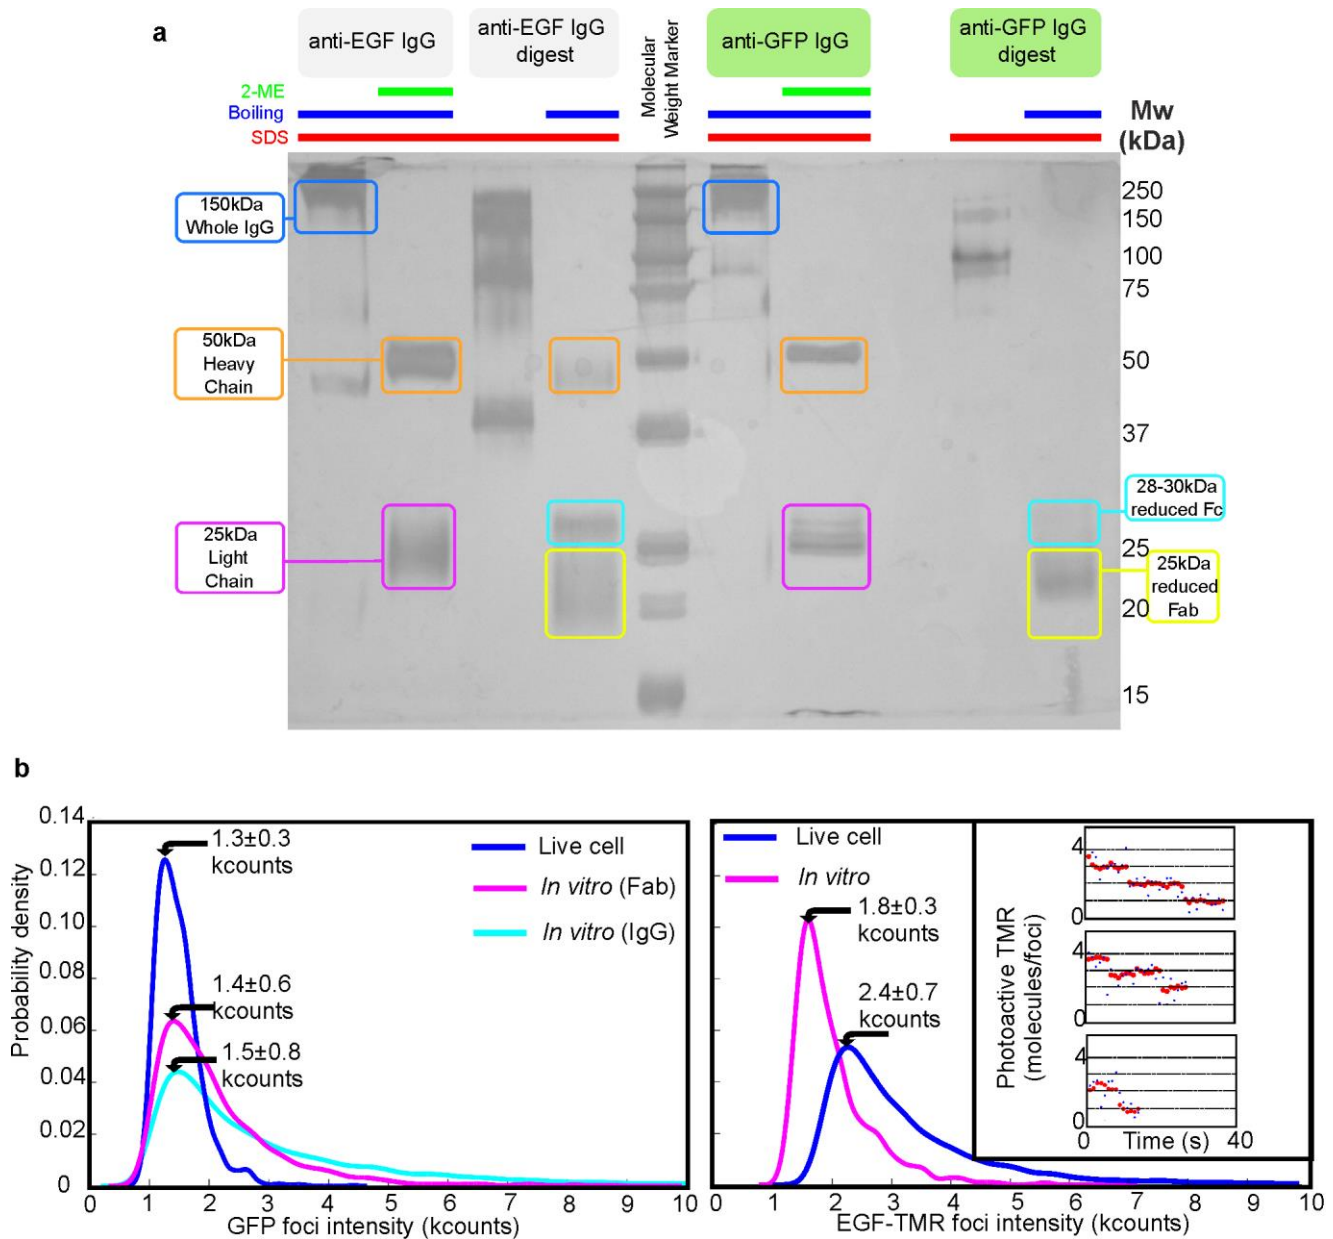

850

851 **Supplementary Figure 3. Characterization of unitary fluorophore brightness values.** **(a)** SDS-PAGE  
 852 gel indicating generation of Fab nanobody fragments (yellow) from anti-EGF and anti-GFP IgG antibodies  
 853 (blue), heaving (orange) and light chains (magenta) indicated with reduced Fc (cyan). **(b)** Kernel density  
 854 estimation<sup>69</sup> distributions of fluorescent foci intensity values measured in kcounts (i.e. counts x 10<sup>3</sup>) for  
 855 single GFP (left panel) for live cell, at the end of the photobleach, before EGF is added compared with *in*  
 856 *vitro* Fab and whole IgG data. TMR molecule data for *in vitro* EGF-TMR and live cell, at the end of the  
 857 photobleach, post EGF binding data taken from colocalized EGF-EGFR foci is shown (right panel); inset

858 shows live cell EGF-TMR photobleach steps after EGF has been added, taken from colocalized EGF-  
859 EGFR foci, with raw (blue) and Chung-Kennedy filter<sup>48,49</sup> (red) traces, mean and s.e.m. indicates (arrows).

860

**BEFORE ligand binding**

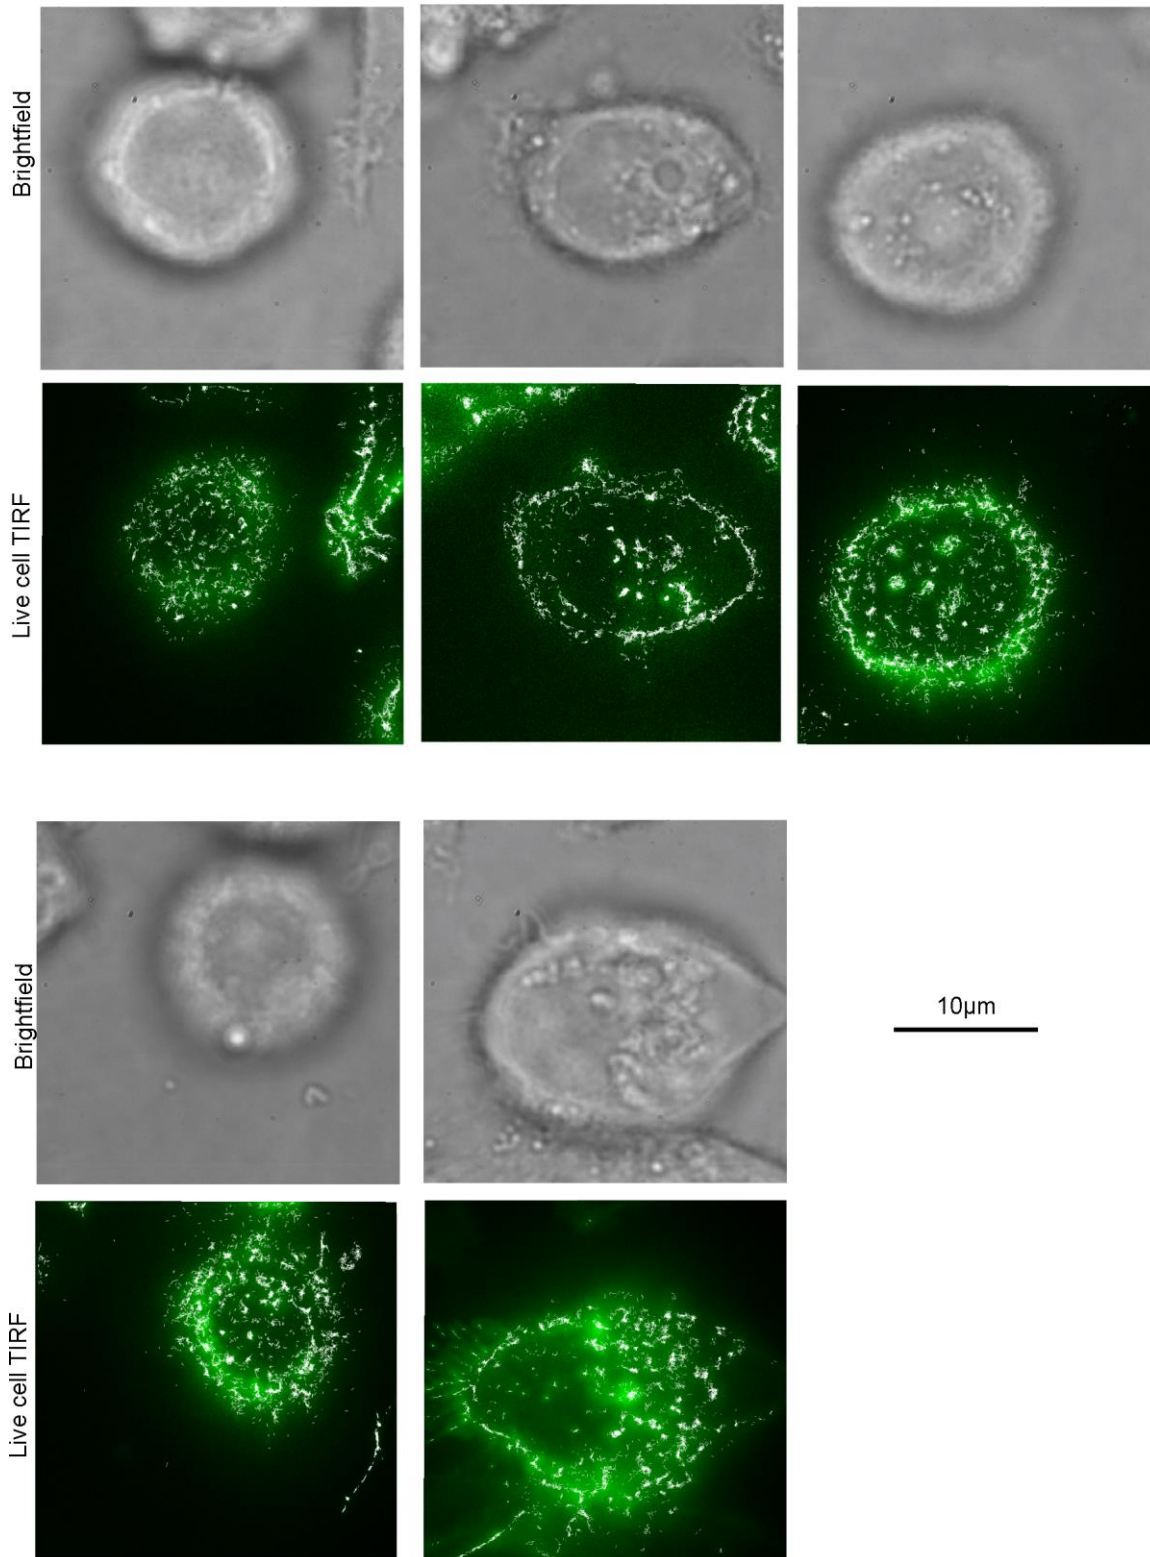

861

862 **Supplementary Figure 4. More examples of cells before addition of EGF ligand.** Brightfield images  
863 (grey) and TIRF (green) shown with overlaid foci tracking output (white).

864

865

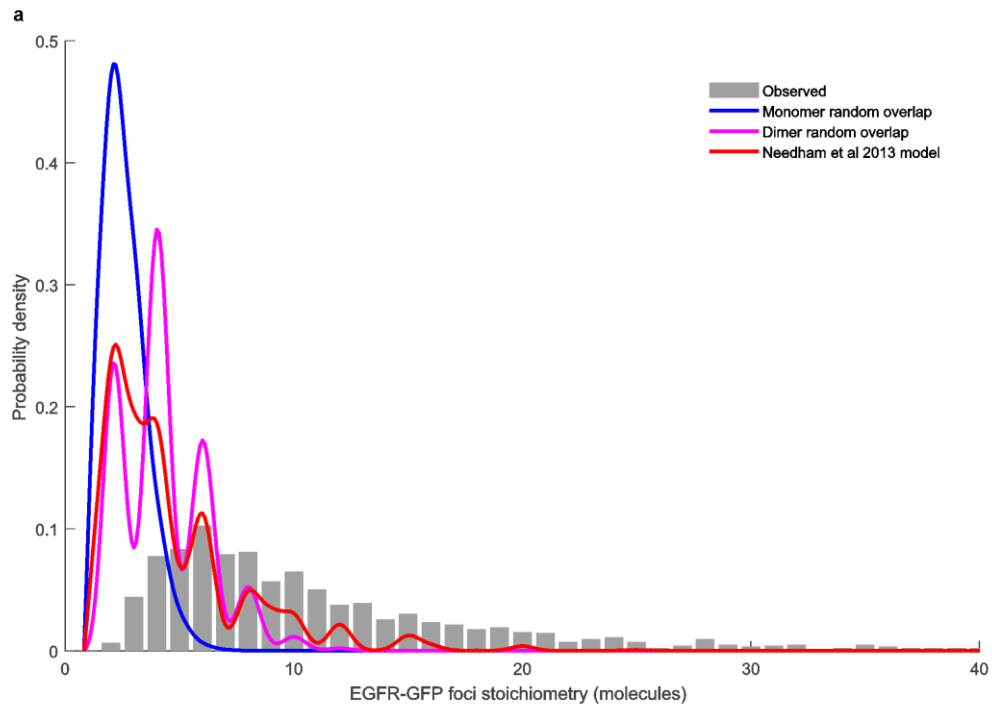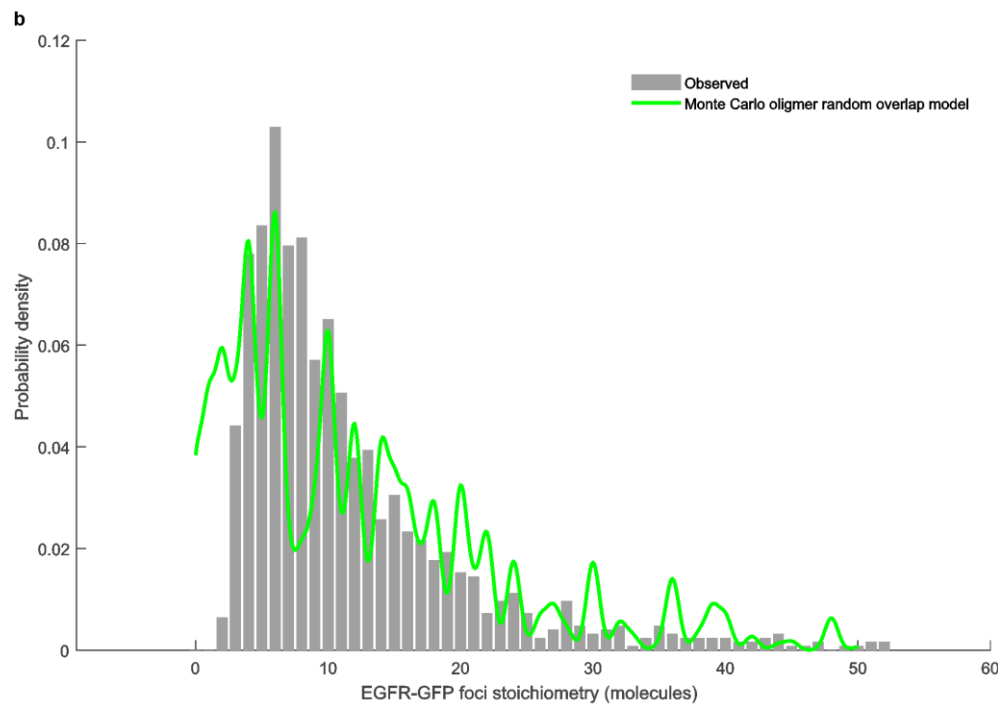

866

867

868

869

870

871

872

**Supplementary Figure 5. Random foci overlap model.** Random overlapping foci predictions for (a) monomeric (blue) and dimeric EGFR (magenta), and a mixed model oligomer model suggested from a previous single-molecule study (red)<sup>35</sup>, all showing poor agreement ( $R^2 < 0$ ) to our experimental observations for stoichiometry distribution (grey). (b) Monte Carlo Poisson model using an expected average value of 6 molecules for EGFR foci stoichiometry (green) showing reasonable fit ( $R^2 = 0.4923$ ) to experimental data (grey).

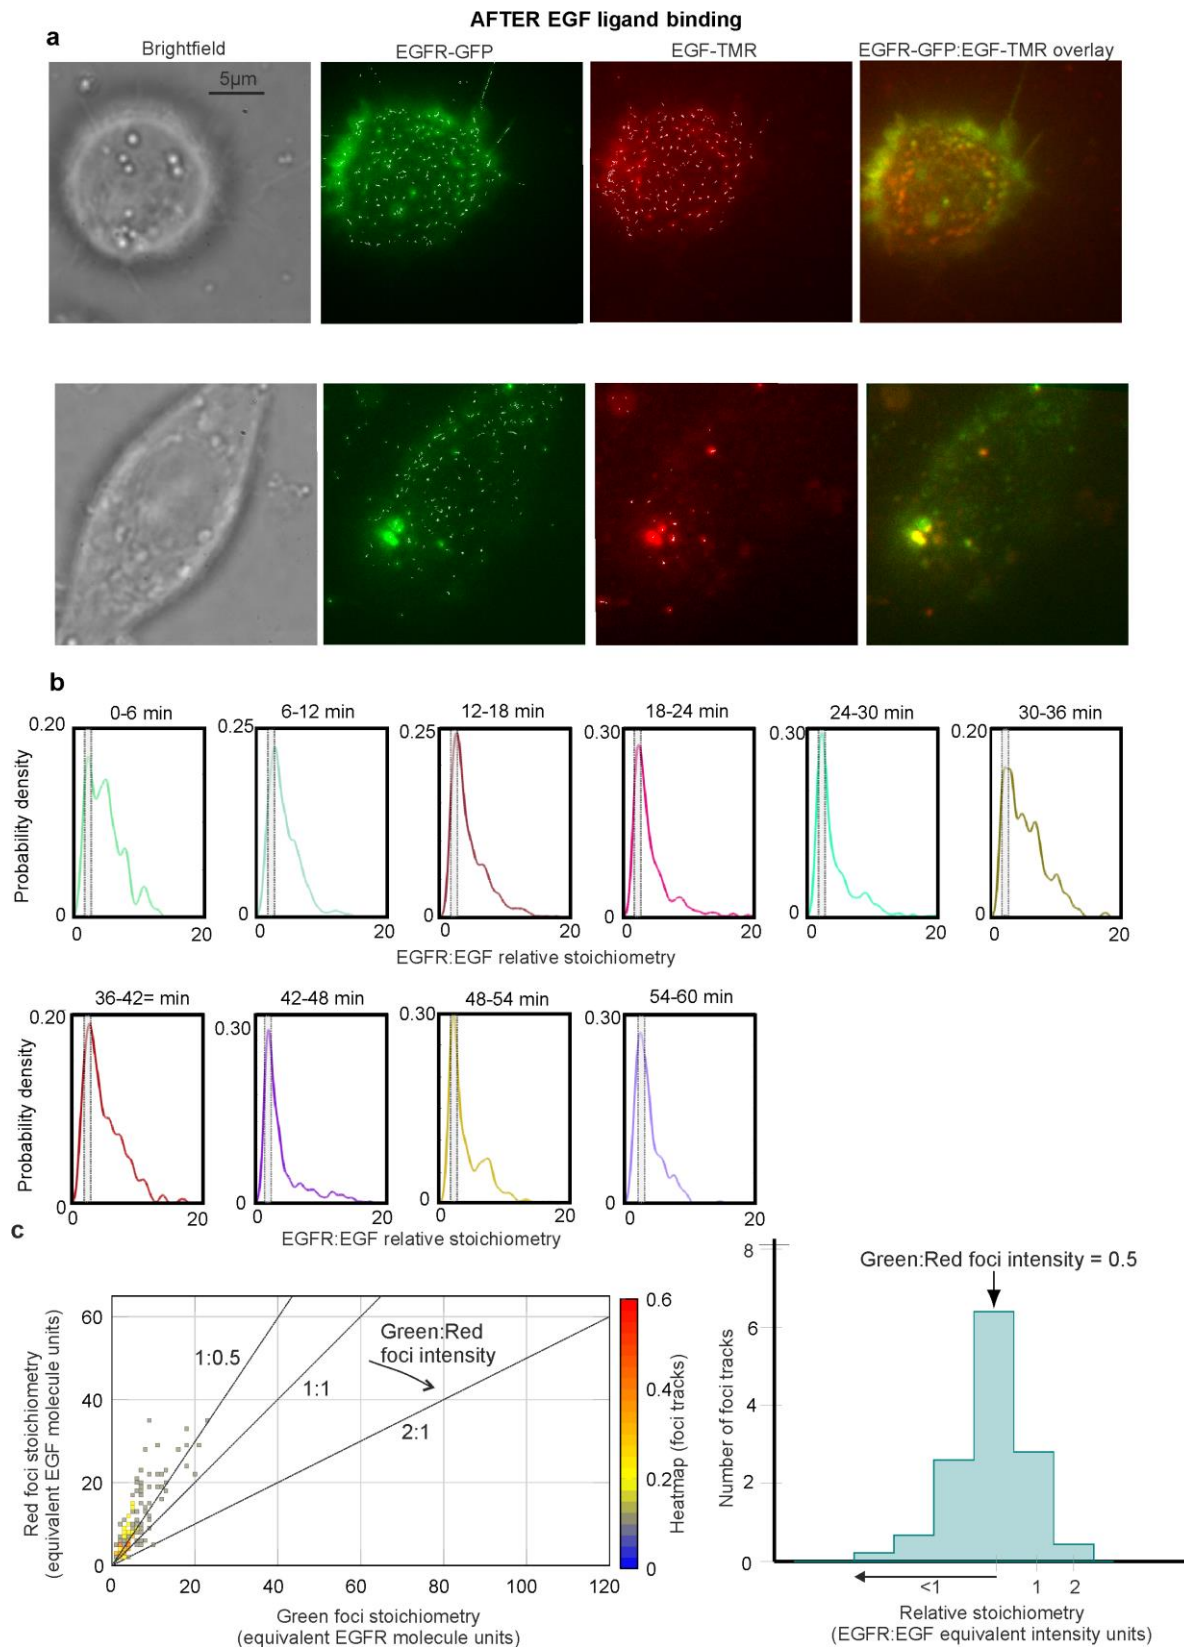

873

874 **Supplementary Figure 6. Charactering EGFR and EGF foci stoichiometry after addition of EGF. (a)**

875 Two examples of cells taken ~10 min after the addition of EGF: brightfield images (grey), green channel

876 showing EGFR-GFP localization (green), red channel showing EGF-TMR localization (red), and the

877 overlay of green and red channels together (right panels, with yellow indicating regions of high

878 colocalization) are shown here. **(b)** Variation of the EGFR:EGF relative stoichiometry, rendered as kernel  
 879 density estimations, as a function of incubation time with EGF (shown in 6 min bins). The region  
 880 corresponding to  $2.0 \pm 0.5$  relative stoichiometry is indicated as a grey rectangle. **(c)** Heatmap (left panel)  
 881 and histogram (right panel) characterizing ‘false’ colocalization due to cellular autofluorescence in green  
 882 and red channels.

883

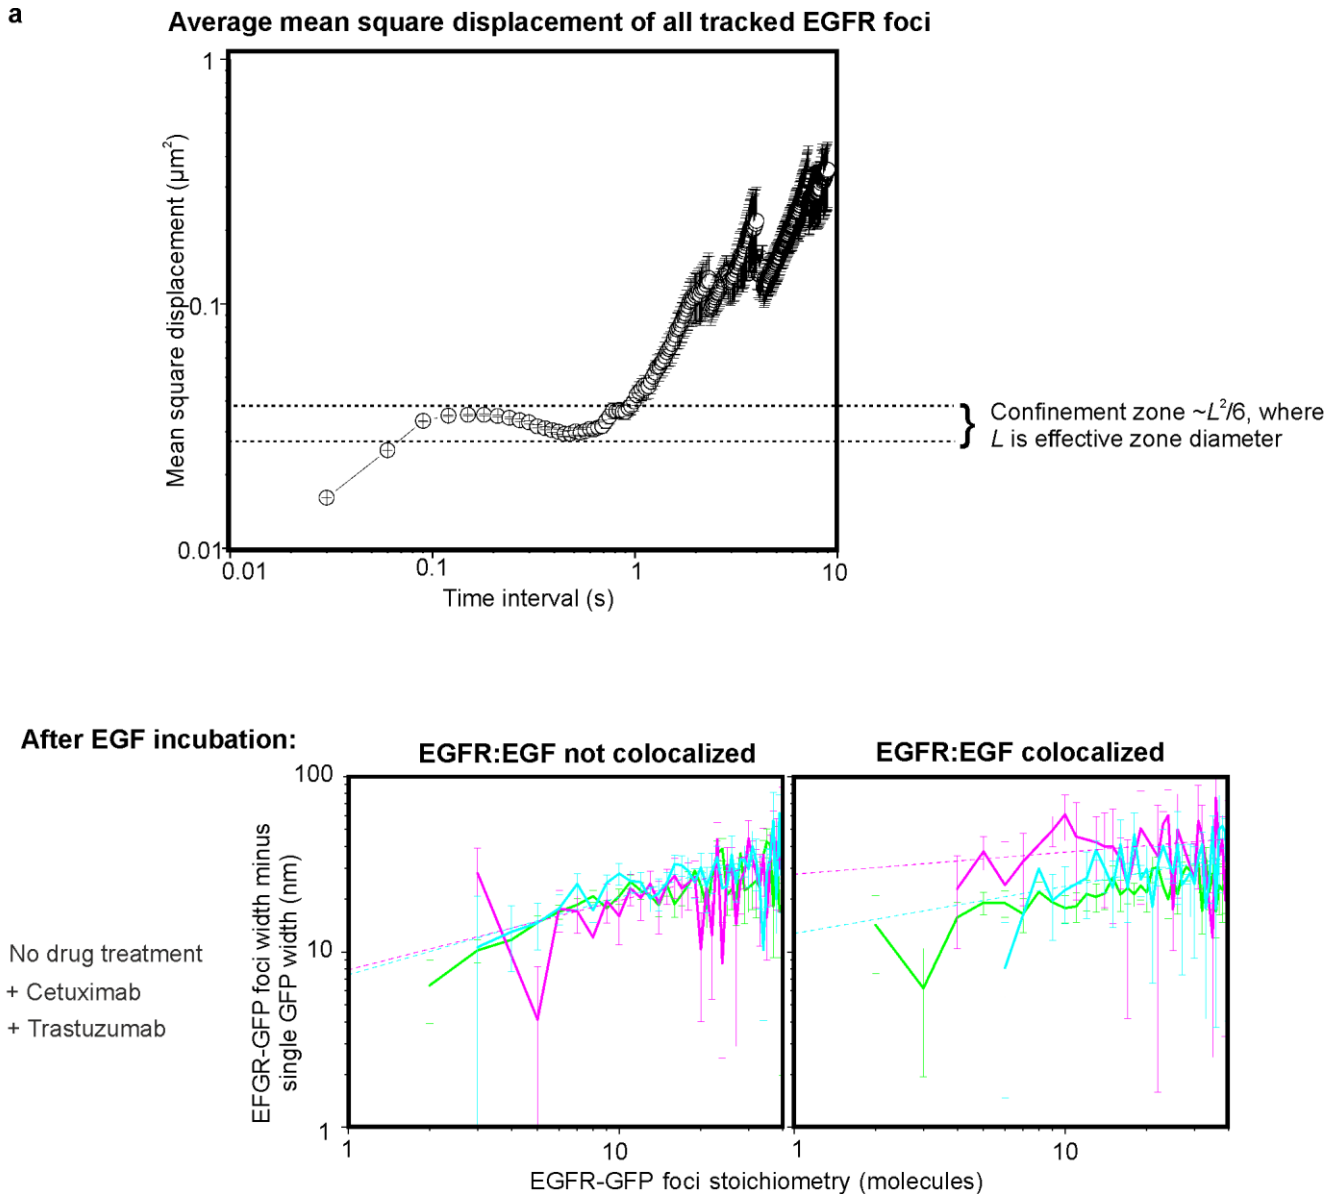

884

885 **Supplementary Figure 7 EGFR foci diffusion.** (a) Log-log plot for average mean square displacement  
 886 vs. time interval for all collated EGFR-GFP foci tracks before addition of EGF, putative confinement zone  
 887 indicated (dashed lines), from number of foci  $N=770$ , acquired from number of cells  $N=19$ . (b) Log-log  
 888 plots of EGFR-GFP foci diameters minus the width for a single GFP molecule vs. stoichiometry for not  
 889 colocalized (left panel) and colocalized foci (right panel), showing cells with no cetuximab or trastuzumab  
 890 treatment (green,  $N=6,710$  foci,  $N=117$  cells), those treated with cetuximab (magenta,  $N=1,219$  foci,  $N=25$   
 891 cells), and those treated with trastuzumab (cyan,  $N=1,607$  foci,  $N=27$  cells), with heuristic power law fit  
 892 (dash lines), s.e.m. error bars.
